# Supplementary material for: C / N ratio, stable isotope (δ 13 C, δ 15 N), and n -alkane patterns of bryophytes along hydrological gradients of low-centred polygon of the Siberian Arctic
Source: Copernicus journal article supplement (doi:10.5194/bg-2016-141), 2016-07-29
Supplement: Supplementary file [file bg-2016-141-AC1-supplement.pdf]

1 *Reply to reviewers' comments concerning the manuscript:*

2 **“C/N ratio, stable isotope ( $\delta^{13}\text{C}$ ,  $\delta^{15}\text{N}$ ), and n-alkane patterns of bryophytes**  
3 **along hydrological gradients of low-centred polygons of the Siberian Arctic”**

4 by R. Zibulski et al.

5  
6 **Referee #2**

7 *Received 19<sup>th</sup> September 2016*

8  
9 We thank reviewer #2 for the valuable comments.

10  
11 **comments:**

12 *The foremost issue is that the n-alkane data are inadequately presented and interpreted. As*  
13 *correctly noted by the authors, mosses typically have lower concentrations of these wax components*  
14 *than vascular land plants. Nonetheless, the absolute concentrations of all 400 samples should be*  
15 *reported in the supplemental material and summarized in either a figure or a table in the*  
16 *manuscript proper. Furthermore, the relative concentrations of the samples should be compared*  
17 *using some of the well established n-alkane ratios such as the Paq, the ACL, and the CPI. For the*  
18 *ACL, I recommend using an extended range (21-33), similar to the extended range used by Bush*  
19 *and McInerney (2015, Org Geochem 79, 65-73). Addition of these ratios will allow better*  
20 *comparison of these new results to results from existing and future studies of wetland*  
21 *biogeochemical records, and it will likely enable the authors to refine their interpretations.*

22  
23 Our response: In the original version of the manuscript we indicated that only 16 samples were  
24 selected for n-alkanes analyses because these samples were also used for other analyses. Thus, we  
25 consider this a preliminary study. We now include Table 2 with the absolute concentrations of all 16  
26 n-alkanes samples and added the  $P_{aq}$  of Ficken et al. (2000) and the ACL with the recommended range  
27 n-C<sub>21</sub> to n-C<sub>33</sub> (ACL<sub>21-33</sub>). During the carbon chain analyses of the 16 samples, there were selected 10  
28 further samples for advanced analysis of even-chain homologues. Thus, we do not calculate the CPI.

29 This entailed changes in the Methods section for n-alkanes (added the formula), in the Results section  
30 (reference to Table 2), and in the Discussion section '4.4 n-alkane patterns'.

31  
32 Methods: Additionally, we calculated the average chain length ( $APL_{21-33}$ ), assumed to represent a  
33 proxy for moisture (Andersson et al, 2011) and temperature (Bush and McInerney, 2015), with a  
34 comprehensible extended range from n-C<sub>21</sub> to n-C<sub>33</sub> and the proxy ratio  $P_{aq}$ , which was developed as a  
35 proxy ratio to distinguish submerged or floating aquatic macrophytes from emergent and terrestrial  
36 plants (Ficken et al., 2000):

$$APL_n = \frac{\sum(n \times C_n)}{\sum C_n} \quad , n = 21 - 33$$

$$P_{aq} = \frac{(C_{23} + C_{25})}{(C_{23} + C_{25} + C_{29} + C_{31})}$$

37 Results: *Evaluations of the n-alkane biomarker proxies,  $ACL_{21-33}$  and  $P_{aq}$ , also show a clear division*  
38 *between the xero-mesophilic and the meso-hygrophilic species groups (Table 2), whereas intraspecific*  
39 *variations are low (with the exception of *Drepanocladus*). The xero-mesophilic group is notable for*  
40 *high averages of the  $APL_{21-33}$  (28.41) and  $P_{aq}$  (-0.06) compared to low averages of  $APL_{21-33}$  (25.61)*  
41 *and  $P_{aq}$  (-0.7) for the meso-hygrophilic group.*

42

43 Discussion: We added citations and rewrote the Discussion section completely.

44

45 *Another issue is that the authors do not make full use of their important documentation of the*  
46 *intraspecific variability in the geochemical properties of these plants. Other studies have found*  
47 *similar variability in both *Sphagnum* (Huang et al., 2012, *Org Geochem* 44, 1-7) and in vascular*  
48 *plants (Feakins et al, 2016, *Org Geochem* 100, 89-199), and they both discuss its possible*  
49 *significance and mention other reports of intraspecific variability. Better appreciation of this*  
50 *variability is important to better interpretation of the paleoenvironmental significance of these*  
51 *properties, and the authors' data could make a better contribution to such understanding that it*  
52 *presently does.*

53

54 Our response: We cite Huang et al. 2012 in the discussion of n-alkanes. The study of Feakins et al.  
55 (2016) concerns an analysis along a temperature gradient. This is not so relevant to our study as our 16  
56 samples of n-alkanes come from one site, as explained in the Methods section 2.4.

57

58 *Yet another issue is that aspects of this study seem to provide answers, at least partial, to some of the*  
59 *questions raised by Andersson et al. (2011, *Org Geochem* 42, 1065-C21075; 2012, *J. Quat. Sci.* 27,*  
60 *545-552) from their study of the changes in C/N ratios, stable carbon and nitrogen isotope values,*  
61 *and n-alkane distributions recorded in the fen-bog transition of a peat sequence in the Russian*  
62 *Arctic. Consideration of these questions and how the new data may address them would enrich both*  
63 *the Introduction and the Discussion of this contribution.*

64

65 Our response: We think this suggestion is justified with regard to meaningful palaeo-reconstructions in  
66 fens with a dominance of brown mosses. Both articles show interesting studies in a changing wetland  
67 with a dominant portion of brown mosses in the lower fen part. However, due to the different  
68 approach of Andersson et al. and especially the different experimental setup with measurements of  
69 bulk instead of species-specific material (e.g. only minor quantities of vascular plant material mask the  
70 signal of n-alkanes<sub>moss</sub> with their higher amount of n-alkanes, and stable isotope properties are changed  
71 by physical fractionation within a soil column) cause problems for a meaningful comparison and  
72 discussion of contrary results. Furthermore, we agree with reviewer #1, who noticed that only recent  
73 material is measured and thus that interpretations and suggestions about fossil material could only be  
74 speculative. However, we added some information and comparisons.

75

76 Addition to Introduction: *We provide C/N ratios by weight of arctic brown mosses, in the anticipation*  
77 *that they will be useful for comparative palaeo-environmental reconstructions (Andersson et al. 2011,*  
78 *) and in the evaluation of organic matter sources in Russian permafrost soils with regard to species*  
79 *and habitat-specific patterns.*

80

81 Addition to Discussion: Andersson et al. (2011) inferred  $ACL_{27-31}$  values of 29 for brown-moss peat  
82 from western Russian during wet phases, which is however, poorly comparable to our results because  
83 they investigated total peat organic instead of pure moss material.

84

85 ***Finally, the authors need to specify in the text and figures whether the C/N ratios that they report***  
86 ***are atomic or weight ratios.***

87

88 Our response: We thank you for this comment and have indicated the 'weight' information throughout  
89  $(C/N_{(wt)})$ .

90 **C/N ratio, stable isotope ( $\delta^{13}\text{C}$ ,  $\delta^{15}\text{N}$ ), and *n*-alkane patterns of**  
91 **bryophytes brown mosses along hydrological gradients of low-**  
92 **centred polygons of the Siberian Arctic**

93 **Romy Zibulski<sup>1,2</sup>, Felix Wesener<sup>4</sup>, Heinz Wilkes<sup>3,5</sup>, Birgit Plessen<sup>3</sup>, Luidmila A. Pestryakova<sup>6</sup>,**  
94 **Ulrike Herzschuh<sup>1,2,7</sup>**

95 <sup>[1]</sup> {Alfred-Wegener-Institut Helmholtz-Zentrum für Polar- und Meeresforschung, 14473  
96 Potsdam, Germany}

97 <sup>[2]</sup> {University of Potsdam, Institute of Earth and Environmental Sciences, 14476 Potsdam-  
98 Golm, Germany}

99 <sup>[3]</sup> {Helmholtz Centre Potsdam GFZ German Research Centre for Geosciences, 14473 Potsdam,  
100 Germany}

101 <sup>[4]</sup> {Humboldt University of Berlin, Institute of Biology, 10115 Berlin, Germany}

102 <sup>[5]</sup> {Institute for Chemistry and Biology of the Marine Environment (ICBM), Carl von Ossietzky  
103 University, 26111 Oldenburg, Germany}

104 <sup>[6]</sup> {Northeast Federal University, Department for Geography and Biology, 677000 Yakutsk,  
105 Russia}

106 <sup>[7]</sup> {University of Potsdam, Institute of Biochemistry and Biology, 14476 Potsdam-Golm,  
107 Germany}

108

109 Correspondence to: Romy Zibulski (R. Zibulski@awi.de)

110 **Abstract**

111 Mosses are a major component of the arctic vegetation, particularly ~~of~~in wetlands. We present C/N  
112 ~~ratio; ratios (by weight),~~  $\delta^{13}\text{C}$  and  $\delta^{15}\text{N}$  data of 400 brown moss samples belonging to 10 species that  
113 were collected along hydrological gradients within polygonal mires located on the southern Taymyr  
114 Peninsula and the Lena River delta in northern Siberia. Additionally, *n*-alkane patterns of six of these  
115 ~~taxa~~species (n = 16) were investigated. The aim of the study is to see whether the inter- and ~~intra-~~  
116 ~~specific~~intraspecific differences in ~~biochemical and C/N,~~ isotopic signatures and n-alkanes are  
117 indicative of habitat with particular respect to water-level. Overall, we find high variability in all  
118 investigated parameters. The  $C/N_{(wt)}$  ratios range between 15.4 and 70.4 (median: 42.943) and show  
119 large variations at ~~intra-specific~~intraspecific level. However, species preferring a dry habitat (xero-

120 mesophilic mosses) show higher  $C/N_{(wt)}$  ratios than those preferring a wet habitat (meso-hygrophilic  
121 mosses). We assume that this mainly originates from the association of mosses from wet habitats with  
122 microorganisms which supply them with nitrogen. Furthermore, because of the stability provided by  
123 water, they do not need to invest in a sturdy stem-structure and accordingly have lower C contents in  
124 their biomass. The  $\delta^{13}C$  values range between -37.0 and -22.5‰ (median = -27.8‰). The  $\delta^{15}N$  values  
125 range between -6.596 and +1.697‰ (median = -2.172‰). We find differences in  $\delta^{13}C$  and  $\delta^{15}N$   
126 signatures between both habitat types ~~and, for~~. For some species of the meso-hygrophilic group, a  
127 ~~significant relation~~ we suggest that a relationship between the individual habitat water-level and  
128 isotopic signature ~~was can be~~ inferred as a function of microbial symbiosis. The *n*-alkane distribution  
129 also shows differences primarily between xero-mesophilic and meso-hygrophilic mosses, i.e. having a  
130 dominance of *n*-alkanes with long (*n*-C<sub>29</sub>, *n*-C<sub>31</sub>) and intermediate (*n*-C<sub>25</sub>) chain lengths ~~(*n*-C<sub>25</sub>)<sub>2</sub>~~  
131 respectively. Overall, our results reveal that ~~biochemical and~~  $C/N_{(wt)}$  ratios, isotopic signals ~~and~~  
132 *n*-alkanes of ~~certain studied brown~~ moss taxa from polygonal wetlands are characteristic of their habitat  
133 ~~and can thus be used in (palaeo-)environmental studies.~~

## 134 1. Introduction

135 Specific physiological and morphological traits enable mosses to attain extensive surface coverage in  
136 low-temperature ecosystems such as arctic tundra (Turetsky et al., 2012; Wasley et al., 2006). Mosses  
137 are a major component of the biomass in arctic wetlands and contribute strongly to the biodiversity. In  
138 particular, the vegetation of the widely distributed polygonal tundra is rich in moss taxa, which partly  
139 originates from the strong compositional turnover along a small-scale hydrologic gradient (Zibulski et  
140 al. 2016). As an intermediate layer between air and the permafrost soil, mosses control the water cycle,  
141 greenhouse gas and energy exchange (Blok et al., 2011; McFadden et al., 2003), and the structure of  
142 the habitats of vascular plant communities in arctic landscapes (Beringer et al., 2001; Gornall et al.,  
143 2011; Malmer et al., 1994). Because of their low decomposition rates (Aerts et al., 1999; Turetsky,  
144 2003), they contribute strongly to the peat and permafrost carbon pool (Tarnocai et al., 2009).

145 Despite the significance of mosses in high-latitude biodiversity and matter cycles only little is  
146 known about their C/N ratio, stable isotope and ~~biochemical~~n-alkane characteristics in comparison to  
147 vascular plants. Such information is not only necessary to improve our understanding of the  
148 physiological adaptation or plasticity of mosses to certain environmental characteristics, but can also  
149 be used when similar measurements of fossil plant material are interpreted as proxies of former  
150 ecological or environmental conditions (e.g. Birks, 1982).

151 Carbon-to-nitrogen ratios (C/N), stable carbon and nitrogen isotope values ( $\delta^{13}\text{C}$ ,  $\delta^{15}\text{N}$ ) and the *n*-  
152 -alkane fingerprints of bulk organic matter are among the most commonly measured parameters of  
153 plant matter (Chambers and Charman, 2004). The C/N ratios of mosses are generally in the range of  
154 those of higher terrestrial plants (Prahel et al., 1980) but are known to depend on the available nitrogen,  
155 which originates in pristine regions from decomposition of organic matter, microbial activity or  
156 atmosphere deposits (e.g. Chanway et al., 2014; Lee et al., 2009). We provide C/N ratios by weight of  
157 arctic brown mosses, in anticipation that they will be useful for comparative palaeo-environmental  
158 reconstructions (Andersson et al. 2011, ) and in the evaluation of organic matter sources in Russian  
159 permafrost soils with regard to species and habitat-specific patterns. Furthermore, C/N ratios may be  
160 related to growth form, i.e. higher ratios can be expected for mosses which compete with vascular  
161 plants for light and thus need to invest in a high stem-stability (Sveinbjörnsson and Oechel, 1992).

162 As well as the C/N ratio, the  $\delta^{13}\text{C}$  signature is barely altered by decomposition processes in the  
163 soil and also suitable for palaeo-environmental reconstructions. The  $\delta^{13}\text{C}$  signatures of an individual  
164 plant are a mixed signal of the physiological traits of the species and the individual's direct  
165 environment. Mosses use the  $\text{C}_3$  pathway for carbon assimilation (O'Leary, 1988, Farquhar et al.,  
166 1989) and despite a lack of stomata in the photosynthetic active parts, they have a similar range in  
167 their  $\delta^{13}\text{C}$  values of between -24 and -32 ‰ (Ménot and Burns, 2001; Rundel et al., 1979; Smith and  
168 Epstein, 1971) as vascular  $\text{C}_3$  plants. Differences in  $\delta^{13}\text{C}$  values among several species can be  
169 explained by individual plant physiology and biochemistry (Galimov, 2000). Differences within a  
170 single species have been linked with environmental conditions such as temperature (Skrzypek et al.,  
171 2007; Waite and Sack, 2011), ~~the~~ growing depth below water-level (Raghoebarsing et al., 2005), ~~the~~

172 | position within a cushion or hummock (Price et al., 1997), ~~the~~ lipid content (Rundel et al., 1979) or the  
173 | influence of microbial symbioses (Liebner et al., 2011; Vile et al., 2014). Furthermore, even  
174 | differences among branches and stems of single individuals ~~are~~have been reported (Loader et al.,  
175 | 2007). However, almost all of these studies were made on Sphagnaceae, which are not representative  
176 | of all mosses because of their specific morphology (i.e. the occurrence of a photosynthetic active cell  
177 | type and a dead cell type, which is responsible for water storage and often an additional coating of the  
178 | photosynthetic active cell) and their specific habitat preferences (i.e. preferring acidic wetlands).  
179 | Hence, this information cannot simply be transferred to brown mosses – which form the major  
180 | component in northern Siberian lowlands – due to their different morphology.

181 | Most studies on  $\delta^{15}\text{N}$  values of moss material have focused on the anthropogenic impact on the  
182 | nitrogen cycle (Harmens et al., 2011; Liu et al., 2008; Poikolainen et al., 2009), whereas reports on the  
183 |  $\delta^{15}\text{N}$  signatures of mosses from relatively pristine ecosystems such as the Arctic are rare or have been  
184 | investigated in relation to the study of bird colonies (e.g. Lee et al., 2009). Potentially, such  
185 | information can indicate pathways and sources of the nutrient supply in these N-limited ecosystems  
186 | (Kielland, 1997; Michelsen et al., 1996, 1998).

187 | Compared with vascular plants and *Sphagnum* species, relatively few investigations of *n*-alkane  
188 | patterns of brown mosses are available. ~~*Sphagnum* species, for example, show a dominance of *n*-C<sub>23</sub>~~  
189 | ~~and *n*-Palaeoenvironmental reconstructions use the potential of *n*-alkanes to distinguish between~~  
190 | ~~different plant groups (Ficken et al., 1998, moisture conditions (Pancost et al., 2000, Nichols et al~~  
191 | ~~2006, Zhou et al. 2010), whether organic material is to decomposed and changes in temperature~~  
192 | ~~(Feakins et al., 2016, Sachse et al., 2006) along distinct gradients. *Sphagnum* species, for example,~~  
193 | ~~show a dominance of *n*-C<sub>23</sub> and *n*-C<sub>25</sub> homologues (Baas et al., 2000) that are comparable to the~~  
194 | ~~pattern of vascular submerged plants (Ficken et al., 2000-), and ratios are used as a proxy for wet~~  
195 | ~~moisture conditions.~~ Other studies discuss the suitability of *n*-alkane patterns in moss species for  
196 | chemotaxonomical studies on recent and fossil material (Bush and McInerney, 2013; Nott et al., 2000;  
197 | Schellekens and Buurman, 2011). A ~~higher~~greater protection potential of waxes with a higher content  
198 | of long-chain *n*-alkanes against solar irradiation or alternatively an enhanced loss of short-chain *n*-  
199 | alkanes by evaporation have been suggested as possible mechanisms to cause different *n*-alkane

200 patterns in leaf waxes of trees (Sachse et al., 2006). However, with respect to mosses the pattern and  
201 mechanisms are even less understood.

202 This study presents C/N<sub>(wt)</sub> isotopic ( $\delta^{13}\text{C}$ ,  $\delta^{15}\text{N}$ ) and ~~biochemical~~ (C/N, *n*-alkanes)alkane  
203 characteristics of mosses from low-centred polygons in northern Siberia. Low-centred polygons are  
204 geomorphological forms in arctic landscapes originating from frost-heave processes in the soil. They  
205 are characterized by elevated dry rims and a water-saturated or water-filled centre. This centimetre-  
206 scale hydrological gradient is well reflected by a strong turnover in the vascular plant and moss  
207 composition (Zibulski et al., 2016). We investigate the relationship between the C/N<sub>(wt)</sub> isotopic and  
208 ~~biochemical~~ *n*-alkane signatures and the hydrological conditions within low-centred polygons. In  
209 particular, we aim to reveal whether fingerprints are habitat-specific or rather species-specific.

## 210 2. Material and methods

### 211 2.1 Sites

212 The plant material was collected from eight low-centred polygons located along a zonal vegetation  
213 gradient ranging from open forest via the forest-tundra intersection to subarctic tundra (Matveev,  
214 1989) to obtain a representative sample set of northern Siberian lowlands (Fig. 1). Six of the polygons  
215 (06/P, 17/P, P3/I, P3/II, P3/III, 12/P), sampled in 2011, are located in the Khatanga River region (70–  
216 72° N, 97–102° E, southern Taymyr Peninsula) and a further two polygons (LP1 and LP2), sampled in  
217 2012, are located on Samoylov Island in the Lena River Delta (72.4° N, 126.5° E). The climate is  
218 cold-humid (Khatanga climate station annual mean temperature and precipitation: -13.2°C and  
219 272 mm, Rivas-Martinez and Rivas-Saenz, 2009; Samoylov climate station annual mean temperature  
220 and precipitation: -12.5°C and 232.7 mm, Boike et al., 2013)).

### 221 2.2 Sampling and studied moss species

222 A representative continuous transect of adjacent one square-metre plots (from rim to rim) was selected  
223 for sampling in each polygon. The surface height in relation to water-level (~~collected~~ measured at the  
224 centre of each plot) and vegetation (abundance information) were recorded. Individual characteristics  
225 of each low-centred polygon are presented in Table A1. Moss plants were hand-picked, dried in the  
226 field and transported to the Alfred Wegener Institute in Potsdam. Taxa identification is based on the



227 relevant literature (Frahm and Frey, 2004; Lobin et al., 1995; Smith, 1978) and the Bryophyte Flora of  
 228 North America internet source (<http://www.efloras.org>).

229 In total, eight species that were observed to have different water-regime preferences were included in  
 230 the analyses. ~~The species were divided into xero-mesophilic and meso-hygrophilic habitat type groups.~~  
 231 ~~Generally the xero-mesophilic group represented by *Hylocomium splendens* (16 cm), *Tomentypnum*  
 232 *nitens* (13 cm), *Aulacomnium turgidum* (13 cm) and *Aulacomnium palustre* (13 cm) can be separated  
 233 from meso-hygrophilic taxa represented by *Hamatocaulis lapponicus* (3 cm), *Warnstorfia exannulata*  
 234 (swimming mat), *Meesia triquetra* (-1 cm), *Drepanocladus revolvens* (-5 cm), *Scorpidium scorpioides*  
 235 (-13 cm), and *Calliergon giganteum* (-30 cm). (Numbers in brackets denote the observed mean plant-  
 236 position relative to the water level.) To approximate water-regime preferences of each species, we  
 237 calculated the mean plant-position in relation to water-level (h) from the recorded plot surface height.  
 238 *Warnstorfia exannulata* was observed to grow as part of a swinging mat at water-level, it was assigned  
 239 a preference for water-level. Using this information the species were classified as either as of xero-  
 240 mesophilic mosses (mean plant-position between 13 and 16 cm in relation to water-level) or to the  
 241 group of meso-hygrophilic mosses (mean plant-position between 3 and -30 cm in relation to water-  
 242 level) to ease the presentation of results.~~

243 **Table 1:** *Calculated mean plant-position relative to the water-level and the classification of the sampled brown moss species.*  
 244 *(\* Samples of Warnstorfia exannulata were growing on a swinging mat at water-level and mean plant position was thus set to*  
 245 *zero.)*

| <u>species</u>                 | <u>abbreviation</u> | <u>h (mean plant-position in relation to water-level in cm)</u> | <u>classification</u> |
|--------------------------------|---------------------|-----------------------------------------------------------------|-----------------------|
| <i>Hylocomium splendens</i>    | Hyl_spl             | 16                                                              | xero-mesophilic       |
| <i>Tomentypnum nitens</i>      | Tom_nit             | 13                                                              | xero-mesophilic       |
| <i>Aulacomnium turgidum</i>    | Aul_tur             | 13                                                              | xero-mesophilic       |
| <i>Aulacomnium palustre</i>    | Aul_pal             | 13                                                              | xero-mesophilic       |
| <i>Hamatocaulis lapponi</i>    | Ham_lap             | 3                                                               | meso-hygrophilic      |
| <i>Warnstorfia exannulata</i>  | War_exa             | 0 *                                                             | meso-hygrophilic      |
| <i>Meesia triquetra</i>        | Mee_tri             | -1                                                              | meso-hygrophilic      |
| <i>Drepanocladus revolvens</i> | Dre_rev             | -5                                                              | meso-hygrophilic      |
| <i>Scorpidium scorpioides</i>  | Sco_sco             | -13                                                             | meso-hygrophilic      |
| <i>Calliergon giganteum</i>    | Cal_gig             | -30                                                             | meso-hygrophilic      |

246  
 247 **2.4 Measurements of C/N<sub>(wt)</sub> ratios, stable carbon and nitrogen isotope values and**  
 248 **n-alkane distributions**

249 Selected plant material (i.e. apical parts of a specimen) ~~were~~was rinsed with de-ionised water and  
 250 mechanically cleaned from organic particulate material. The total content of carbon and nitrogen ( $C_{total}$   
 251 ~~and  $N_{total}$ )~~ and the ratio of stable isotopes ( $\delta^{13}C$ ,  $\delta^{15}N$ ) were measured with a DELTAplusXL isotope  
 252 ratio mass spectrometer (Thermo Fischer Scientific) coupled to an elemental analyser (NC2500 Carlo

253 Erba) via a CONFLOW III Interface. Due to the relatively wide range of C/N-ratios of mosses, we  
254 used about 1.5 mg for each carbon stable isotope measurement and a replicate of 3.0 mg for each  
255 nitrogen stable isotope measurement and the analysis of elemental composition. The high weight  
256 needed for the nitrogen sample replicates prevented the measurement of  $\delta^{15}\text{N}$  and thus the C/N<sub>(wt)</sub> for  
257 some samples. The calibration for carbon was performed using ~~a certified elemental~~ an urea standard  
258 ~~(urea)~~ and a  $\delta^{13}\text{C}$  isotopic standard (IAEA CH-7). The nitrogen contents were calibrated against an  
259 acetanilide standard and the nitrogen isotopic composition with ammonium sulphate standard (IAEA  
260 N-1). The reliability of the method was checked with the NIST plant standard SRM 1547. The isotopic  
261 ratios are given in delta notation relative to VPDB for  $\delta^{13}\text{C}$  values and relative to air for  $\delta^{15}\text{N}$  values,  
262 respectively. The reproducibility for replicate analyses is 0.2% for carbon and nitrogen and 0.2‰ for  
263  $\delta^{13}\text{C}$  and  $\delta^{15}\text{N}$  values.

264 *n*-Alkane analyses were performed on a subset of samples. We took material from the polygon  
265 complex P3 from the Khatanga region (72.149° N, 102.693° E), which comprises three successive  
266 low-centred polygons (Table A1) to exclude effects of environmental conditions at different locations.  
267 The moss samples were washed, identified and air-dried. They were weighed (150–1000 mg dry  
268 weight) and samples extracted with an accelerated solvent extractor (ASE) (Dionex, Sunnyvale; USA)  
269 using  $\text{Cl}_2\text{Me}:\text{MeOH}$  (10:1) at 5 bar and 75°C. The extract was separated into aliphatic hydrocarbon,  
270 aromatic hydrocarbon and nitrogen, sulphur and oxygen compound fractions using medium pressure  
271 liquid chromatography ~~according to~~ following Radke et al. (1980). Considering the low *n*-alkane  
272 concentrations of our samples, 5  $\mu\text{g}$  of quantification standard (5 $\alpha$ -androstane, 1-ethylpyrene, 5  $\alpha$ -  
273 androstan-17-one and erucic acid) were added. Gas chromatography (GC) of aliphatic hydrocarbon  
274 fractions was performed using a GC Agilent 6890 equipped with an Ultra-1 fused silica capillary  
275 column (Model Agilent 19091A-105, length 50 m, inner diameter 200  $\mu\text{m}$ , film thickness 0.33  $\mu\text{m}$ ).  
276 Helium was used as a carrier gas at a constant flow rate of 1  $\text{ml min}^{-1}$ . The GC oven was heated from  
277 40 °C (2 min hold time) to 300 °C (65 min hold time) at a rate of 5 °C per minute. The samples were  
278 injected by means of splitless injection. Quantitative evaluation of data was done with ChemStation  
279 software. Additionally, we calculate the average chain length (ACL<sub>21-33</sub>) assumed to represent a proxy  
280 for moisture (Andersson et al, 2011) and temperature (Bush and McInerney, 2015) with a

281 comprehensible extended range from  $n$ -C<sub>21</sub> to  $n$ -C<sub>33</sub> and the proxy ratio  $P_{aq}$ , which was developed as a  
282 proxy ratio to distinguish submerged or floating aquatic macrophytes from emergent and terrestrial  
283 plants (Ficken et al., 2000):

$$ACL_n = \frac{\sum(n \times C_n)}{\sum C_n}, n = 21 - 33$$

$$P_{aq} = \frac{(C_{23} + C_{25})}{(C_{23} + C_{25} + C_{29} + C_{31})}$$

284

## 285 **2.5 Statistical Tests**

286 We calculated the range, .25, .5, and .75 quantiles of  $\delta^{13}\text{C}$  and  $\delta^{15}\text{N}$  values and the  $C/N_{(wt)}$  ratios for all  
287 species (Table A2). Significant differences in the  $C/N_{(wt)}$  ratios and  $\delta^{13}\text{C}$  and  $\delta^{15}\text{N}$  values among  
288 different groups were ~~tested~~assessed with a t-test. In addition, we performed linear regression between  
289 the obtained values for each singleindividual species and surface height. All analyses were  
290 implemented in R version 3.2.0 (R Core Team, 2015). Furthermore, we performed a PCA with the  
291 percentage of  $n$ -alkane homologues (square-root transformed) in R withusing the vegan package  
292 version 2.0-10 (Oksanen et al., 2013).

## 293 **3. Results**

294 The overall ranges in  $C/N_{(wt)}$  ratios of both groups have a broad overlap (xero-mesophilic: 22.5–67.9;  
295 meso-hygrophilic: 15.4–70.4). However, the medians of the  $C/N_{(wt)}$  values of the xero-mesophilic  
296 species ranging from 47.6 to 52.9 (Fig. 2) are significantly higher than those of the meso-hygrophilic  
297 group, which range from 37.1 to 46.5 ( $t = 8.17$ ,  $p \ll 0.001$ ). The  $C/N_{(wt)}$  ratios among individual  
298 species are not significantly correlated with the water-level (Fig. 3a), except for *Tomentypnum nitens*  
299 ( $r^2 = 0.11$ ,  $p < 0.05$ ).

300 The  $\delta^{13}\text{C}$  values of the meso-hygrophilic group (-34.9 to -22.5‰) cover the range of the xero-  
301 mesophilic group (-32.1 to -24.2‰), which have a noticeably lower variance in  $\delta^{13}\text{C}$  values (Fig. 2).  
302 The medians of the singleindividual species in the xero-mesophilic group (range: -29.4 to -27.1‰) are  
303 not significantly different ( $t = -1.69$ ,  $p = 0.09$ ) from those of the meso-hygrophilic group (range: -29.2

304 to -24.8‰).  $\delta^{13}\text{C}$  values of *Meesia triquetra*, *Drepanocladus revolvens*, and *Scorpidium scorpioides*  
305 (all belonging to the meso-hydrophilic group) are significantly positively correlated with the position  
306 of the water-level (Fig. 3b), while no member of the xero-mesophilic group revealed such relationship  
307 (Fig. 3a).

308 The ranges of  $\delta^{15}\text{N}$  values of both groups are rather similar (Fig. 2). However, individual species  
309 medians of both groups are significantly different ( $t = -6.96$ ,  $p \ll 0.001$ ; xero-mesophilic group; -3.2  
310 to -2.7‰, meso-hydrophilic group: -2.9 to -0.1). *Drepanocladus revolvens*, *Scorpidium scorpioides*,  
311 and *Calliergon giganteum*, all belonging to the meso-hydrophilic group, exhibit a positive  
312 ~~relationship~~ relationship between the  $\delta^{15}\text{N}$  values and position relative to ~~the~~ water-level. (Fig. 3b).

313 *n*-Alkane distributions show the expected ~~odd over even~~ predominance of the odd chain length.  
314 (Table 2). The absolute *n*-alkane concentrations (*n*-C<sub>19</sub> to *n*-C<sub>33</sub>) range from 34 to 238  $\mu\text{g g}^{-1}$  of dry  
315 weight. The individual taxa show significant differences with respect to carbon number of the most  
316 abundant *n*-alkane: (*n*-C<sub>max</sub>) forming unimodal distribution patterns. It is *n*-C<sub>31</sub> for *Tomentypnum*  
317 *nitens*, which is also the only species containing *n*-C<sub>33</sub> in detectable amounts, *n*-C<sub>29</sub> for *Aulacomnium*  
318 *turgidum*, *n*-C<sub>27</sub> for *Aulacomnium palustre*, *n*-C<sub>27</sub> and *n*-C<sub>25</sub> for the *Drepanocladus* taxa, and ~~*n*-C<sub>25</sub>~~ C<sub>max</sub>  
319 = 25 for *Scorpidium scorpioides*. These differences in the *n*-alkane composition largely correlate with  
320 the species-preferred mean plant-position relative to water-level (Fig. 4).

321 ~~The described~~ Evaluations of the *n*-alkane biomarker proxies, ACL<sub>21-33</sub> and P<sub>aq</sub>, also show a clear  
322 division between the xero-mesophilic and the meso-hydrophilic species groups (Table 2), whereas  
323 intraspecific variations are rather small (with the exception of *Drepanocladus*). The xero-mesophilic  
324 group is notable for high averages of ACL<sub>21-33</sub> (28.41) and P<sub>aq</sub> (-0.06) compared to low averages of  
325 ACL<sub>21-33</sub> (25.61) and P<sub>aq</sub> (-0.7) for the meso-hydrophilic group. There are no intersections, with the  
326 exception of *Drepanocladus*.

327 The general trends are also visible in the biplot of the first two PCA axes which together explain  
328 only 16.9% of the variance in the dataset (Fig. 5). The first axis separates xero-mesophilic from meso-  
329 hydrophilic taxa. *Aulacomnium* taxa are located in the upper range and *Tomentypnum nitens* in the

330 lower range of the second PCA axis, while no trend is observed within the meso-hydrophilic group  
 331 along the second axes.

332 **Table 2:** *The concentration ( $\mu\text{g/g}$  dry weight) and  $ACL_{21-33}$  and  $P_{aq}$  (after Ficken et al., 2000) of n-alkanes in*  
 333 *brown moss samples. (Numbers in brackets relates to the sample number.)*

| <u>species</u>                        | <u>n-C<sub>19</sub></u> | <u>n-C<sub>21</sub></u> | <u>n-C<sub>23</sub></u> | <u>n-C<sub>25</sub></u> | <u>n-C<sub>27</sub></u> | <u>n-C<sub>29</sub></u> | <u>n-C<sub>31</sub></u> | <u>n-C<sub>33</sub></u> | <u>ACL<sub>21-33</sub></u> | <u>P<sub>aq</sub></u> |
|---------------------------------------|-------------------------|-------------------------|-------------------------|-------------------------|-------------------------|-------------------------|-------------------------|-------------------------|----------------------------|-----------------------|
| <b>Xero-mesophilic habitat group</b>  |                         |                         |                         |                         |                         |                         |                         |                         |                            |                       |
| Tom_nit (1)                           | 0                       | 2.0689                  | 2.6374                  | 6.0816                  | 10.7454                 | 17.7273                 | 34.0742                 | 0                       | 28.86                      | 0.13                  |
| Tom_nit (2)                           | 0.5571                  | 1.041                   | 1.4493                  | 2.6964                  | 9.1008                  | 8.4867                  | 20.2818                 | 7.2312                  | 29.47                      | 0.11                  |
| Tom_nit (3)                           | 0.9936                  | 1.456                   | 2.175                   | 2.8712                  | 9.6118                  | 7.2721                  | 21.2309                 | 4.9717                  | 29.14                      | 0.14                  |
| Aul_tur (1)                           | 0                       | 0.968                   | 1.126                   | 2.2001                  | 8.9548                  | 23.5267                 | 3.5595                  | 0                       | 28.15                      | 0.1                   |
| Aul_tur (2)                           | 1.028                   | 1.3468                  | 1.2794                  | 4.8797                  | 18.7427                 | 50.9291                 | 5.5645                  | 0                       | 28.22                      | 0.16                  |
| Aul_pal (1)                           | 0                       | 1.9298                  | 2.5459                  | 4.7646                  | 20.5085                 | 7.5826                  | 7.979                   | 0                       | 27.35                      | 0.25                  |
| Aul_pal (2)                           | 0.7341                  | 1.0767                  | 1.5183                  | 2.9728                  | 12.3293                 | 11.0909                 | 4.9109                  | 0                       | 27.69                      | 0.07                  |
| <b>Meso-hydrophilic habitat group</b> |                         |                         |                         |                         |                         |                         |                         |                         |                            |                       |
| Dre_rev (1)                           | 0.7868                  | 1.5426                  | 2.3659                  | 43.833                  | 19.0836                 | 5.1551                  | 3.5637                  | 0                       | 25.92                      | 0.58                  |
| Dre_rev(2)                            | 0.981                   | 1.5227                  | 2.7605                  | 22.5638                 | 14.5103                 | 6.5356                  | 7.5623                  | 0                       | 26.6                       | 0.34                  |
| Dre_sp.                               | 1.4696                  | 1.9968                  | 5.0986                  | 29.6729                 | 30.4582                 | 9.9108                  | 5.1317                  | 0                       | 26.38                      | 0.18                  |
| Sco_Sco (1)                           | 0                       | 3.7612                  | 11.7002                 | 133.4207                | 29.0024                 | 6.2023                  | 1.9425                  | 0                       | 25.3                       | 0.56                  |
| Sco_Sco (2)                           | 0                       | 3.8911                  | 10.4693                 | 93.7009                 | 21.4601                 | 5.8531                  | 1.7706                  | 0                       | 25.29                      | 0.40                  |
| Sco_Sco (3)                           | 0.8856                  | 2.7949                  | 11.8988                 | 134.378                 | 24.2348                 | 5.4035                  | 2.4969                  | 0                       | 25.28                      | 0.55                  |
| Sco_Sco (4)                           | 1.6217                  | 5.5813                  | 11.705                  | 101.7602                | 21.3126                 | 6.9161                  | 2.4522                  | 0                       | 25.26                      | 0.44                  |
| Sco_Sco (5)                           | 1.4083                  | 3.8857                  | 11.8966                 | 121.5701                | 23.3167                 | 4.315                   | 1.7261                  | 0                       | 25.21                      | 0.41                  |
| Sco_Sco (6)                           | 1.345                   | 2.6672                  | 19.4796                 | 170.3015                | 34.3255                 | 6.8599                  | 3.1732                  | 0                       | 25.28                      | 0.95                  |

## 334 4. Discussion

### 335 4.1 C/N<sub>(wt)</sub> ratios

336 The C/N ratios of mosses from polygonal tundra in Northern Siberia are relatively low—when  
 337 compared with those obtained for mosses from Antarctic bogs that range between 80 and 100 (Björck  
 338 et al., 1991) or from western Canada that range between 55 and 76 (Kuhry and Vitt, 1996). However,  
 339 neither the taxa nor the habitats sampled were fully comparable to those of our analyses, i.e. many  
 340 more taxa typical of xeric and mesic growing conditions were sampled in Antarctica and Canada. All  
 341 investigated species are considered as ectohydric mosses, which receive nitrogen mostly from  
 342 precipitation deposits (Ayres et al., 2006). Our results reveal that C/N<sub>(wt)</sub> ratios for the xero-mesophilic  
 343 moss group are higher than for the meso-hydrophilic group, probably ~~portraying~~ reflecting the known  
 344 difference between terrestrial and aquatic plants (Meyers and Ishiwatari, 1993). Competition with  
 345 vascular plants (1) and accessibility of nitrogen pools (2) may be the main reasons for this finding. (1)

346 If moss plants invest in a high stem-to-leaf biomass ratio, which ~~is reflected by results in~~ a high  $C/N_{(wt)}$   
347 ratio, they will increase their height and stability, ~~resulting in better competition with and thus their~~  
348 ~~competitive ability against~~ vascular plants for light (Sveinbjörnsson and Oechel, 1992). Furthermore,  
349 ~~the low N input by precipitation and~~ a low N content of moss litter slows down the fungal and  
350 bacterial N mineralisation which increases the thickness of moss litter mats (Gornall et al., 2007;  
351 Turetsky, 2003). This in turn will increase the isolating function of moss mats, thus negatively  
352 affecting seed germination of vascular plants (Gornall et al., 2007). (2) ~~Higher~~  $C/N_{(wt)}$  ratios of  
353 ~~meso-hygrophilic mosses may originate from higher~~ amounts of dissolved nitrogen in ~~water due~~  
354 ~~to polygon waters as a result of high net primary productivity, the presence of  $N_2$ -fixation of~~  
355 ~~algae, fixers such as~~ cyanobacteria, and ~~other microorganisms may lead to a lower C/N ratio. the~~  
356 ~~exudations of zooplankton.~~ Frahm (2001) assumes that loose ~~epi-epiphytic~~ and endophytic symbiotic  
357 relationships between mosses and cyanobacteria are probably restricted to wetland taxa. Lindo et al.  
358 (2013) report such associations between brown mosses and cyanobacteria. Thus, the N supply is better  
359 for brown mosses preferring ~~wet~~ meso-hygrophilic than ~~dry~~ xero-mesophilic habitats, and the  
360 respective taxa accordingly have lower  $C/N_{(wt)}$  ratios: indicating habitat-specific variation in  $C/N_{(wt)}$   
361 ratios. We expected to also find ~~a relationship in~~ intraspecific variations between  $C/N_{(wt)}$  ratios and  
362 water-level. However, the signal-to-noise ratio is probably too low to give a meaningful result because  
363 only the average water level of each plot but not of each individual plant was recorded.

#### 364 **4.2 $\delta^{13}C$ values**

365 With respect to bryophytes, most isotopic studies have hitherto been performed on *Sphagnum* (Markel  
366 et al., 2010, Ménot and Burns, 2001) while our study focuses on brown mosses – a major component  
367 in Siberian wetlands. ~~For~~ The intraspecific variability for some meso-hygrophilic species (i.e. *Meesia*  
368 *triquetra*, *Drepanocladus revolvens*, *Scorpidium scorpioides*) ~~we find~~ show that the  $\delta^{13}C$  signals are  
369 significantly related to the hydrological conditions at the growing site of each individual, i.e.  
370 individuals growing at dry sites showed higher  $\delta^{13}C$  values than those growing at wet sites. No  
371 significant difference among the two habitat-groups is observed; rather they partly contradict the  
372 intraspecific findings in that some of the xero-mesophilic species known to prefer dry rims such as

373 | *Hylocomium splendens* and *Tomentypnum nitens* ~~known to prefer dry rims~~ have particularly low  $\delta^{13}\text{C}$   
374 | medians.

375 | Differences in moss  $\delta^{13}\text{C}$  values either reflect a source signal depending on water level or a  
376 | physiological reaction of the plant related to water-level (Bramley-Alves et al., 2014; Proctor et al.,  
377 | 1992). Mosses are typical  $\text{C}_3$  plants (Farquhar et al., 1989, Rundel et al., 1979) characterized by a high  
378 |  $\text{CO}_2$  compensation point (Bain and Proctor, 1980; Dilks and Proctor, 1975; Salvucci and Bowes,  
379 | 1981). The high availability of atmospheric  $\text{CO}_2$  and elevated diffusion rates of  $\text{CO}_2$  in air compared to  
380 | water (O'Leary) result in typical terrestrial  $\text{C}_3$  land plant  $\delta^{13}\text{C}$  characteristics, because of a decreasing  
381 | cell water pressure in dry habitats which entails a strong discrimination rate against  $^{13}\text{CO}_2$  induced by  
382 | RuBisCO (Rice and Giles, 1996). ~~With respect to the xero-mesophilic group, we observe an increase~~  
383 | ~~in discrimination against  $^{13}\text{C}$  from taxa preferring a low position relative to the water-level (e.g.~~  
384 | ~~*Aulacomnium* taxa) than those preferring high positions (e.g. *Hylocomium splendens*). In contrast, if~~  
385 | ~~plant tissue is coated by a water film, the cell water pressure ~~reaches~~ should reach an optimum, which~~  
386 | ~~is expected to~~ results in a weaker discrimination rate against  $^{13}\text{C}$  by RuBisCO (Rice and Giles, 1996),  
387 | because of a source restriction by the slower diffusion rate of  $\text{CO}_2$  in water (Lloyd and Farquhar,  
388 | 1994). ~~This A lower carbon isotope discrimination related to water saturation is observed for only~~  
389 | ~~three species out of six meso-hygrophilic mosses. However, this~~ basic signal may be masked by  
390 | variations in  $\delta^{13}\text{C}$  values of different carbon sources, which are expected to be more influential ~~in~~  
391 | ~~water saturated habitats. As  $\text{CO}_2$  uptake in mosses occurs exclusively by the above soil organs, the  $^{13}\text{C}$~~   
392 | ~~enriched sources of deeper soil sections, originating from simple kinetic fraction by weight within the~~  
393 | ~~vertical soil profile, should not be accessible.~~

394 | ~~for meso-hygrophilic mosses in water-saturated conditions. Ménot and Burns (2001) studied~~  
395 | ~~intraspecific variations for three *Sphagnum* species, which prefer three different habitat types (dry,~~  
396 | ~~meso, wet) along an elevational gradient, which was positively correlated with precipitation. They find~~  
397 | ~~a decline in discrimination against  $^{13}\text{C}$  with increasing wetness, and similar to our results no~~  
398 | ~~relationship for species with a strong wet –preference. This is attributed to the variation in  $\delta^{13}\text{C}$  from~~  
399 | ~~highly varying dissolved inorganic carbon (Proctor et al., 1992). The studies of Ruttner (1947) and~~



400 ~~Bain and Proctor (1980) show that, in general, moss taxa are incapable of bicarbonate uptake. Hence,~~  
401 ~~bicarbonate, known to be a carbon source for submerged vascular plants and algae (Herzschuh et al.,~~  
402 ~~2010; Merz, 1992), can most probably be excluded as a carbon source for moss and thus as a factor~~  
403 ~~influencing the  $\delta^{13}\text{C}$  value. Moreover, the bicarbonate content in pond waters in northern Siberian~~  
404 ~~landscapes is very low (Wetterich et al., 2008).~~ Mosses potentially access  $^{13}\text{C}$ -depleted  $\text{CO}_2$  that  
405 originates from oxidation of typically strongly  $^{13}\text{C}$ -depleted biogenic methane by methanotrophic  
406 microorganisms (Kip et al., 2010; Liebner et al., 2011; Raghoebarsing et al., 2005). Studies by Nichols  
407 et al. (2009) show that a higher water level at the peat surface is crucial for an increasing high  
408 methane-derived  $\text{CO}_2$  release. Furthermore, symbiosis with methanotrophs enhances the moisture-  
409 related effect on the  $\delta^{13}\text{C}$  signal of bryophytes. Endophytic microorganisms in hyalocytes of  
410 submerged *Sphagnum* (Raghoebarsing et al., 2005) or epiphytic microorganisms on submerged brown  
411 mosses (Liebner et al., 2011) are presumed to provide ~~directly~~ $^{13}\text{C}$ -depleted  $\text{CO}_2$  directly to the lamina  
412 cells of mosses. ~~The studies of Ruttner (1947) and Bain and Proctor (1980) show that, in general, moss~~  
413 ~~taxa are incapable of bicarbonate uptake. Hence, bicarbonate, known to be a carbon source for~~  
414 ~~submerged vascular plants and algae (Herzschuh et al., 2010; Merz, 1992), can most probably be~~  
415 ~~excluded as a carbon source for moss and thus as a factor influencing the  $\delta^{13}\text{C}$  value. Moreover, the~~  
416 ~~bicarbonate content in pond waters in northern Siberian landscapes is very low (Wetterich et al.,~~  
417 ~~2008).~~ Other sources of  $^{13}\text{C}$ -depleted  $\text{CO}_2$  are surface run-off during spring flooding, rain events ~~or~~and  
418 decomposition processes in the pond (Leng and Marshall, 2004; Maberly et al., 2013). Yet we cannot  
419 fully eliminate the possibility that the measured bulk material was contaminated in parts with ~~epi-~~  
420 ~~epiphytic~~ or ~~endo-phytic~~endophytic microorganisms. The overall signature would, however, likely be  
421 unaffected, as Ménot and Burns (2001) ~~could show~~have shown that the  $\delta^{13}\text{C}$  values of bulk organic  
422 material and alpha-cellulose of *Sphagnum* are very similar. Finally, considering the relationship of  
423 selected brown mosses to mean plant position, the complex origin of plant-available carbon makes it  
424 difficult to interpret the  $\delta^{13}\text{C}$  record, especially for meso-hygrophilic brown mosses as well as  
425 *Sphagnum* (Prince et al., 1997, Ménot and Burns, 2001).

#### 426 4.3 $\delta^{15}\text{N}$ isotopes



427 Like  $\delta^{13}\text{C}$ , the interpretation of stable nitrogen isotope signatures of mosses is challenging because,  
428 again, source signals need to be separated from those originating from physiological isotopic  
429 discrimination processes. Our results yield relatively  $^{15}\text{N}$ -depleted  $\delta^{15}\text{N}$  values for xero-mesophilic  
430 mosses growing preferentially on rims compared to meso-hygrophilic mosses.

431 The terrestrial arctic systems are generally thought to be nitrogen limited (Gordon et al., 2001;  
432 Kielland, 1997). On the rim sites, atmospheric deposition can be considered to be the most important  
433 source for nitrogen (Jonasson and Shaver, 1999) originating from fog, dew, precipitation and surface  
434 run-off (Sveinbjörnsson and Oechel, 1992). However, most of the nitrogen available to rim mosses  
435 originates from recycling of already  $^{15}\text{N}$ -depleted higher plant and moss litter (Turetsky, 2003). The  
436 ectohydric morphology enables an efficient nutrient uptake across the entire moss plant surface via  
437 trapped water. In fact, the meso-hygrophilic group has a higher N content than the xero-mesophilic  
438 group (see section on C/N ratio). Inorganic nitrogen, but especially the high amounts of organic  
439 nitrogen provided by N-mineralization in tundra soils (Kielland, 1995) are important for mosses  
440 growing on the rather dry sites such as the polygonal rims (Atkin, 1996).

441 Three of the investigated submerged or floating moss species show a significant positive  
442 relationship between water-level and  $\delta^{15}\text{N}$  values. These results are similar to those of Asada et al.  
443 (2005) who tested a relationship between  $\delta^{15}\text{N}$  values of different *Sphagnum* species and their position  
444 relative to the groundwater level, which they assumed to originate from different nitrogen sources and  
445 different internal fractionating processes. We assume that the often heavier nitrogen isotope signature  
446 of meso-hygrophilic brown moss individuals originates from the high degree of symbiotic associations  
447 with aquatic atmospheric nitrogen-fixing autotrophic microorganisms such as *Nostoc* or *Anabena*  
448 (Lindo et al., 2013) or methanotrophs (Vile et al., 2014). The high spatial degree with endo- or  
449 ectosymbiotic  $\text{N}_2$ -fixing microorganisms enables the direct uptake of their nitrogen products, which is  
450 similar to that of  $\text{N}_2$  in air.

#### 451 **4.4 *n*-alkane patterns**

452 Compared to vascular plants that are characterized by a thick leaf-wax layer, mosses produce only a  
453 small amount of *n*-alkanes (Baas et al., 2000; Ficken et al., 1998). Like previous studies on vascular

454 plants (Aichner et al., 2010; Ficken et al., 2000; Meyers and Ishiwatari, 1993), our results generally  
455 reveal a differentiation between terrestrial taxa (i.e. xero-mesophilic group) characterized mainly by *n*-  
456 *n*-alkanes maximizing at *n*-C<sub>29</sub> and *n*-C<sub>31</sub> and submerged living taxa (i.e. the meso-hygrophilic group)  
457 maximizing at *n*-C<sub>25</sub> and *n*-C<sub>27</sub>. ~~Our results thus confirm earlier~~ Earlier investigations of Nott et al.  
458 (2000), Baas et al. (2000) and Bingham et al. (2010), who compared the *n*-alkane fingerprints of  
459 *Sphagnum* taxa growing along a hydrological gradient, agree with our results.

460 ~~We furthermore found that individual specimens of a single xero-mesophilic moss species show~~  
461 ~~high variability in their *n* alkane patterns, potentially originating from significant small scale~~  
462 ~~environmental variability on polygon rims. In contrast, the *n* alkane patterns of wet habitat taxa cover~~  
463 ~~a small range only, potentially reflecting the buffering function of water, and thus these patterns are~~  
464 ~~promising for chemotaxonomic identification of their remains in peat sequences (Bush and~~  
465 ~~McInerney, 2013; Nott et al., 2000). However, these initial results of our study need to be corroborated~~  
466 ~~with a larger data set.~~

467 Huang et al. (2012a) and Ficken et al. (1998) used proxy ratios (ACL, P<sub>aq</sub>) to divide moss taxa roughly  
468 by their moisture preferences. They calculate the ACL<sub>23-33</sub> for samples of lichens and *Racomitrum*  
469 *lanuginosum*, which have similar hydrological requirements to our xero-mesophilic mosses. Despite  
470 the slightly narrower ACL<sub>23-33</sub> range, their results show similarities to our xero-mesophilic group. A  
471 comparison between ACL<sub>21-33</sub> ratios of *Sphagnum* (plant position nearly at water-level) of Huang et al.  
472 (2012b) and our brown mosses shows that the ACL<sub>21-33</sub> ratios of *Sphagnum* species are rather lower.  
473 The intraspecific conclusion of Huang et al. (2012b) (wetter moisture conditions entail lower ACL<sub>21-</sub>  
474 33) for *Sphagnum* is reflected by our measurements for *Drepanocladus* and *Scorpidium*, i.e. they show  
475 a dependence with water level. As we observed a clear difference in the ACL<sub>21-33</sub> between the xero-  
476 mesophilic and the meso-hygrophilic group, we suggest that the inclusion of mid-chain *n*-alkanes (*n*-  
477 C<sub>21</sub> to *n*-C<sub>25</sub>) in the equation of ACL improves its value as a proxy for moisture conditions. Andersson  
478 et al. (2011) inferred ACL<sub>27-31</sub> values of 29 for brown-moss peat from western Russian during wet  
479 phases, which is however, poorly comparable to our results because they investigated total peat  
480 organic matter instead of pure moss material.

481 Ficken et al. (2000) proposed  $P_{aq}$  as a semi-quantitative proxy ratio for the differentiation of  
482 terrestrial and aquatic plants (<0.1 terrestrial plants, 0.1–0.4 emergent macrophytes, 0.4–1  
483 submerged/floating macrophytes). Our inferred  $P_{aq}$  results for the individual species fit well with these  
484 assumptions. For example, submerged/floating *Scorpidium* ( $P_{aq}$  median: 0.56) has a higher median  $P_{aq}$   
485 value than floating/mesic *Drepanocladus* ( $P_{aq}$  median: 0.34), which is again higher than that of the  
486 xero-mesophilic mosses *Tomentypnum* ( $P_{aq}$  median: 0.13) and *Aulacomnium* ( $P_{aq}$  median: 0.13).  
487 Ficken et al. (2000) also measured a *Drepanocladus* sample ( $P_{aq} = 0.30$ ). Overall, our results do not  
488 support the inference of Nichols et al. (2006) that a hydrological classification is possible between  
489 *Sphagnum* and non-*Sphagnum* formed peat as the latter show wide variations between different  
490 habitats. The inferred broad  $P_{aq}$  range of *Drepanocladus* and *Aulacomnium* probably indicates that  
491 intraspecific variation is related to the individual's growing condition, which could provide the basis  
492 to develop  $P_{aq}$  as a proxy for water-level when measured on taxonomically identified fossil plant  
493 material.

494 As with  $P_{aq}$ , *n*-alkanes seem to be species-specific given stable environmental parameters and are  
495 related to the species-specific moisture requirements, which are adapted to changing environmental  
496 conditions. Thus, our results confirm the conclusions of Bingham et al. (2010), Bush and McNerney  
497 (2015) and Nott et al. (2000) that the pattern of *n*-alkanes has the potential to become a valuable proxy  
498 for chemotaxonomic identification and moisture conditions. *Scorpidium scorpioides*, a species with a  
499 rather narrow preference range (i.e. it is limited to open water conditions), shows low intraspecific  
500 variations. This matches the results for *Sphagnum* compiled by Bingham et al. (2010), which also  
501 show minor intraspecific variations. *Aulacomnium* in contrast, which grows in a rather wide range of  
502 moisture conditions, shows strong variations in its *n*-alkane spectra: whether this is a function of the  
503 individual's growing conditions, however, needs to be investigated in a more extensive study.

## 504 **5. Conclusions**

505 The habitat and intraspecific isotopic and chemical patterns of 10 brown-moss species detected along  
506 small-scale hydrological gradients in Siberian polygonal tundra ~~was~~were studied.

507 The observed higher C/N<sub>(wt)</sub> ratios of xero-mesophilic mosses compared to those of the meso-  
508 hygrophilic mosses originate from the different ~~trait~~environmental requirements when living emergent  
509 (i.e. investment in a higher stability resulting in high C/N ratios) as opposed to submerged.  
510 Furthermore, the latter group may also gain a better nitrogen supply through microbial symbioses.

511 With respect to the isotopic source pools, the meso-hygrophilic species have greater access than  
512 xero-mesophilic species, probably through symbioses with microorganisms- and dissolved carbon. The  
513 approximate habitat-specific division of  $\delta^{13}\text{C}$  values resulting from discrimination by RuBisCO under  
514 different hydrological regimes, is overturned by the influence of microbial symbioses and makes a  
515 clear distinction between both habitat types impossible. For species, growing near the water level, no  
516 intraspecific relationship with water level was observed probably as a result of the parallel impact of  
517 processes causing opposing  $\delta^{13}\text{C}$  trends.

518 Our analyses reveal that, compared with xero-mesophilic mosses, meso-hygrophilic mosses are  
519 characterized by enriched  $\delta^{15}\text{N}$  values probably originating from microbial symbioses. Both carbon  
520 and nitrogen isotopic ratios seem to be valuable proxies to differentiate between taxa preferring the  
521 polygon rim or pond. Moreover, with respect to meso-hygrophilic mosses, the detected positive  
522 relations between intraspecific variations and the individuals' relative growing position could allow  
523 even more semi-quantitative information about water-level changes to be inferred. The *n*-alkane  
524 patterns of brown mosses (limited 16 individuals belonging to five species) indicate that they are  
525 species-specific and have thus the potential to be developed as a chemotaxonomic proxy.

526 ~~We also find that *n* alkane patterns of brown mosses are characteristic for single species as well~~  
527 ~~as for the individuals' specific hydrological growing conditions. However, the potential~~  
528 ~~chemotaxonomic and proxy value of *n* alkane analyses needs to be further explored in a more~~  
529 ~~extensive study.~~

530 Overall, our study indicates that C/N, isotopic and ~~biochemical~~*n*-alkane analyses of ~~recent or~~  
531 ~~fossil~~brown moss material has a high environmental indicator potential, particularly if species-specific  
532 material, ~~because of the physiological characteristics of mosses~~, instead of bulk material is analysed.

533 **References**

- 534 Aerts, R., Verhoeven, J. T. A. and Whigham, D. F.: Plant-mediated controls on nutrient cycling in  
535 temperate fens and bogs, *Ecology*, 80(7), 2170–2181, 1999.
- 536 Aichner, B., Herzsuh, U. and Wilkes, H.: Influence of aquatic macrophytes on the stable carbon  
537 isotopic signatures of sedimentary organic matter in lakes on the Tibetan Plateau, *Org. Geochem.*,  
538 41(7), 706–718, doi:10.1016/j.orggeochem.2010.02.002, 2010.
- 539 [Andersson, R. A., Kuhry, P., Meyers, P., Zebühr, Y., Crill, P., Mörth, M.: Impacts of  
540 paleohydrological changes on n-alkane biomarker compositions of a Holocene peat sequence in the  
541 eastern European Russian Arctic, \*Org. Geochem.\*, 42, 1065-1075,  
542 doi:10.1016/j.orggeochem.2011.06.020, 2011.](#)
- 543 Asada, T., Warner, B. G. and Aravena, R.: Nitrogen isotope signature variability in plant species from  
544 open peatland, *Aquat. Bot.*, 82(4), 297–307, doi:10.1016/j.aquabot.2005.05.005, 2005.
- 545 Atkin, O. K.: Reassessing the nitrogen relations of Arctic plants: a mini-review, *Plant Cell Environ.*,  
546 19(6), 695–704, doi:10.1111/j.1365-3040.1996.tb00404.x, 1996.
- 547 Baas, M., Pancost, R., van Geel, B. and Sinninghe Damsté, J. S.: A comparative study of lipids in  
548 *Sphagnum* species, *Org. Geochem.*, 31(6), 535–541, doi:10.1016/S0146-6380(00)00037-1, 2000.
- 549 Bain, J. T. and Proctor, M. C. F.: The requirement of aquatic bryophytes for free CO<sub>2</sub> as an inorganic  
550 carbon source: Some experimental Evidence, *New Phytol.*, 86(4), 393–400, doi:10.1111/j.1469-  
551 8137.1980.tb01680.x, 1980.
- 552 Beringer, J., Lynch, A. H., Chapin, F. S., Mack, M. and Bonan, G. B.: The representation of Arctic  
553 soils in the Land Surface Model: The importance of mosses, *J. Clim.*, 14(15), 3324–3335,  
554 doi:10.1175/1520-0442(2001)014<3324:TROASI>2.0.CO;2, 2001.
- 555 Bingham, E. M., McClymont, E. L., Väiliranta, M., Mauquoy, D., Roberts, Z., Chambers, F. M.,  
556 Pancost, R. D. and Evershed, R. P.: Conservative composition of *n*-alkane biomarkers in *Sphagnum*  
557 species: implications for palaeoclimate reconstruction in ombrotrophic peat bogs, *Org. Geochem.*,  
558 41(2), 214–220, 2010.
- 559 Birks, H. J. B.: Quaternary bryophyte palaeoecology, in *Bryophyte Ecology*, edited by A. J. E. Smith,  
560 pp. 473–490, Springer Netherlands. [online] Available from:  
561 [http://link.springer.com/chapter/10.1007/978-94-009-5891-3\\_13](http://link.springer.com/chapter/10.1007/978-94-009-5891-3_13) (Accessed 2 March 2014), 1982.
- 562 Björck, S., Malmer, N., Hjort, C., Sandgren, P., Ingólfsson, Ó., Wallén, B., Smith, R. I. L. and  
563 Jónsson, B. L.: Stratigraphic and paleoclimatic studies of a 5500-year-old moss bank on Elephant  
564 Island, Antarctica, *Arct. Alp. Res.*, 23(4), 361–374, doi:10.2307/1551679, 1991.
- 565 Blok, D., Heijmans, M. M. P. D., Schaepman-Strub, G., Ruijven, J. van, Parmentier, F. J. W.,  
566 Maximov, T. C. and Berendse, F.: The cooling capacity of mosses: Controls on water and energy  
567 fluxes in a Siberian tundra site, *Ecosystems*, 14(7), 1055–1065, doi:10.1007/s10021-011-9463-5,  
568 2011.
- 569 Boike, J., Kattenstroth, B., Abramova, K., Bornemann, N., Chetverova, A., Fedorova, I., Fröb, K.,  
570 Grigoriev, M., Grüber, M., Kutzbach, L., Langer, M., Minke, M., Muster, S., Piel, K., Pfeiffer, E.-M.,  
571 Stooß, G., Westermann, S., Wischniewski, K., Wille, C. and Hubberten, H.-W.: Baseline characteristics  
572 of climate, permafrost and land cover from a new permafrost observatory in the Lena River Delta,  
573 Siberia (1998–2011), *Biogeosciences*, 10(3), 2105–2128, doi:10.5194/bg-10-2105-2013, 2013.

- 574 Bramley-Alves, J., Wanek, W., French, K. and Robinson, S. A.: Moss  $\delta^{13}\text{C}$ : an accurate proxy for past  
575 water environments in polar regions, *Global Change Biology*, 21, 2454-2464, doi:10.1111/gcb.12848,  
576 2014.
- 577 Bush, R. T. and McInerney, F. A.: Leaf wax *n*-alkane distributions in and across modern plants:  
578 implications for paleoecology and chemotaxonomy, *Geochim. Cosmochim. Acta*, 117, 161–179, 2013.
- 579 [Bush, R. T. and McInerney, F. A.: Influence of temperature and C 4 abundance on n-alkane chain  
580 length distributions across the central USA, \*Org. Geochim.\*, 117, 161–179,  
581 doi:10.1016/j.orggeochem.2014.12.003, 2015.](#)
- 582 Chambers, F. M. and Charman, D. J.: Holocene environmental change: contributions from the  
583 peatland archive, *The Holocene*, 14(1), 1–6, 2004.
- 584 Chanway, C. P., Anand, R. and Yang, H.: Nitrogen Fixation Outside and Inside Plant Tissues, [online]  
585 Available from: <http://cdn.intechopen.com/pdfs-wm/46070.pdf> (Accessed 5 May 2015), 2014.
- 586 Dilks, T. J. K. and Proctor, M. C. F.: Comparative experiments on temperature responses of  
587 bryophytes: assimilation, respiration and freezing damage, *J. Bryol.*, 8(3), 317–336, 1975.
- 588 Farquhar, G. D., Ehleringer, J. R. and Hubick, K. T.: Carbon isotope discrimination and  
589 photosynthesis, *Annu. Rev. Plant Biol.*, 40(1), 503–537, 1989.
- 590 Ficken, K. J., Barber, K. E. and Eglinton, G.: Lipid biomarker,  $\delta^{13}\text{C}$  and plant macrofossil stratigraphy  
591 of a Scottish montane peat bog over the last two millennia, *Org. Geochem.*, 28(3-4), 217–237, 1998.
- 592 Ficken, K. J., Li, B., Swain, D. L. and Eglinton, G.: An *n*-alkane proxy for the sedimentary input of  
593 submerged/floating freshwater aquatic macrophytes, *Org. Geochem.*, 31(7–8), 745–749,  
594 doi:10.1016/S0146-6380(00)00081-4, 2000.
- 595 Frahm, J. P.: *Biologie der Moose*, Spektrum Akademischer Verlag., 2001.
- 596 Frahm, J.-P. and Frey, W.: *Moosflora*, 4., neubearbeitete und erweiterte Auflage., UTB, Stuttgart.,  
597 2004.
- 598 Galimov, E. M.: Carbon isotope composition of Antarctic plants, *Geochim. Cosmochim. Acta*, 64(10),  
599 1737–1739, doi:10.1016/S0016-7037(99)00328-2, 2000.
- 600 Gordon, C., Wynn, J. M. and Woodin, S. J.: Impacts of increased nitrogen supply on high Arctic  
601 heath: the importance of bryophytes and phosphorus availability, *New Phytol.*, 149(3), 461–471,  
602 doi:10.1046/j.1469-8137.2001.00053.x, 2001.
- 603 Gornall, J. L., Jónsdóttir, I. S., Woodin, S. J. and van der Wal, R.: Arctic mosses govern below-ground  
604 environment and ecosystem processes, *Oecologia*, 153(4), 931–941, 2007.
- 605 Gornall, J. L., Woodin, S. J., Jónsdóttir, I. S. and van der Wal, R.: Balancing positive and negative  
606 plant interactions: how mosses structure vascular plant communities, *Oecologia*, 166(3), 769–782,  
607 2011.
- 608 Harmens, H., Norris, D. A., Cooper, D. M., Mills, G., Steinnes, E., Kubin, E., Thöni, L., Aboal, J. R.,  
609 Alber, R., Carballeira, A., Coşkun, M., De Temmerman, L., Frolova, M., González-Miqueo, L., Jeran,  
610 Z., Leblond, S., Liiv, S., Maňkiovská, B., Pesch, R., Poikolainen, J., Rühling, Å., Santamaria, J. M.,  
611 Simonè, P., Schröder, W., Suchara, I., Yurukova, L. and Zechmeister, H. G.: Nitrogen  
612 concentrations in mosses indicate the spatial distribution of atmospheric nitrogen deposition in  
613 Europe, *Environ. Pollut.*, 159(10), 2852–2860, doi:10.1016/j.envpol.2011.04.041, 2011.

- 614 Herzschuh, U., Mischke, S., Meyer, H., Plessen, B. and Zhang, C.: Using variations in the stable  
615 carbon isotope composition of macrophyte remains to quantify nutrient dynamics in lakes, *J.*  
616 *Paleolimnol.*, 43(4), 739–750, doi:10.1007/s10933-009-9365-0, 2010.
- 617 [Huang, X., Xue, J., Zhang, J., Qin, Y., Meyers, P. A. and Wang, H.: Long chain n -alkanes and their  
618 carbon isotopes in lichen species from western Hubei Province: implication for geological records,  
619 \*Frontiers in Earth Science.\*, 6\(1\), 95-100, doi:10.1007/s11707-012-0300-8, 2012a.](#)
- 620 [Huang, X., Xue, J., Zhang, J., Qin, Y., Meyers, P. A. and Wang, H.: Effect of different wetness  
621 conditions on Sphagnum lipid composition in the Erxianyan peatland, central China, \*Organic  
622 Geochemistry.\*, 44, 1-7, 2012b.](#)
- 623 Jonasson, S. and Shaver, G. R.: Within-stand nutrient cycling in arctic and boreal wetlands, *Ecology*,  
624 80(7), 2139–2150, doi:10.1890/0012-9658(1999)080[2139:WSNCIA]2.0.CO;2, 1999.
- 625 Kielland, K.: Landscape patterns of free amino acids in arctic tundra soils, *Biogeochemistry*, 31(2),  
626 85–98, doi:10.1007/BF00000940, 1995.
- 627 Kielland, K.: Role of free amino acids in the nitrogen economy of arctic cryptogams, *Écoscience*, 4(1),  
628 75–79, 1997.
- 629 Kip, N., van Winden, J. F., Pan, Y., Bodrossy, L., Reichart, G.-J., Smolders, A. J. P., Jetten, M. S. M.,  
630 Damsté, J. S. S. and Op den Camp, H. J. M.: Global prevalence of methane oxidation by symbiotic  
631 bacteria in peat-moss ecosystems, *Nat. Geosci.*, 3(9), 617–621, doi:10.1038/ngeo939, 2010.
- 632 Kuhry, P. and Vitt, D. H.: Fossil carbon/nitrogen ratios as a measure of peat decomposition, *Ecology*,  
633 77(1), 271–275, doi:10.2307/2265676, 1996.
- 634 Lee, Y. I., Lim, H. S. and Yoon, H. I.: Carbon and nitrogen isotope composition of vegetation on King  
635 George Island, maritime Antarctic, *Polar Biol.*, 32(11), 1607–1615, doi:10.1007/s00300-009-0659-5,  
636 2009.
- 637 Leng, M. J. and Marshall, J. D.: Palaeoclimate interpretation of stable isotope data from lake sediment  
638 archives, *Quat. Sci. Rev.*, 23(7), 811–831, 2004.
- 639 Liebner, S., Zeyer, J., Wagner, D., Schubert, C., Pfeiffer, E.-M. and Knoblauch, C.: Methane oxidation  
640 associated with submerged brown mosses reduces methane emissions from Siberian polygonal tundra,  
641 *J. Ecol.*, 99(4), 914–922, doi:10.1111/j.1365-2745.2011.01823.x, 2011.
- 642 Lindo, Z., Nilsson, M.-C. and Gundale, M. J.: Bryophyte-cyanobacteria associations as regulators of  
643 the northern latitude carbon balance in response to global change, *Glob. Change Biol.*, 19(7), 2022–  
644 2035, 2013.
- 645 Liu, X.-Y., Xiao, H.-Y., Liu, C.-Q., Li, Y.-Y. and Xiao, H.-W.: Stable carbon and nitrogen isotopes of  
646 the moss *Haplocladium microphyllum* in an urban and a background area (SW China): The role of  
647 environmental conditions and atmospheric nitrogen deposition, *Atmos. Environ.*, 42(21), 5413–5423,  
648 doi:10.1016/j.atmosenv.2008.02.038, 2008.
- 649 Lloyd, J. and Farquhar, G. D.: <sup>13</sup>C discrimination during CO<sub>2</sub> assimilation by the terrestrial biosphere,  
650 *Oecologia*, 99(3-4), 201–215, 1994.
- 651 Loader, N. J., McCarroll, D., van der Knaap, W. O., Robertson, I. and Gagen, M.: Characterizing  
652 carbon isotopic variability in *Sphagnum*, *The Holocene*, 17(3), 403–410,  
653 doi:10.1177/0959683607076474, 2007.
- 654 Lobin, W., Fischer, E., Frahm, J.-P., Frey, W. and Gams, H.: *Kleine Kryptogamenflora, Bd.4, Die*  
655 *Moospflanzen und Farnpflanzen Europas*, 6. Aufl., Spektrum Akademischer Verlag., 1995.



- 656 Maberly, S. C., Barker, P. A., Stott, A. W. and De Ville, M. M.: Catchment productivity controls CO<sub>2</sub>  
657 emissions from lakes, *Nat. Clim. Change*, 3(4), 391–394, 2013.
- 658 Malmer, N., Svensson, B. M. and Wallén, B.: Interactions between *Sphagnum* mosses and field layer  
659 vascular plants in the development of peat-forming systems, *Folia Geobot. Phytotaxon.*, 29(4), 483–  
660 496, 1994.
- 661 Markel, E. R., Booth, R. K. and Qin, Y.: Testate amoebae and  $\delta^{13}\text{C}$  of *Sphagnum* as surface-moisture  
662 proxies in Alaskan peatlands, *The Holocene* [online] Available from:  
663 <http://hol.sagepub.com/content/early/2010/02/22/0959683609354303.abstract>(Accessed 15 June  
664 2015), 2010.
- 665 Matveev, I.A. (ed.): *Agricultural Atlas of the Republic Sakha (Yakutia)*, Nauka, Moscow., 1989.
- 666 McFadden, J. P., Eugster, W. and Chapin, F. S.: A regional study of the controls on water vapor and  
667 CO<sub>2</sub> exchange in arctic tundra, *Ecology*, 84(10), 2762–2776, doi:10.1890/01-0444, 2003.
- 668 Ménot, G. and Burns, S. J.: Carbon isotopes in ombrogenic peat bog plants as climatic indicators:  
669 calibration from an altitudinal transect in Switzerland, *Org. Geochem.*, 32(2), 233–245,  
670 doi:10.1016/S0146-6380(00)00170-4, 2001.
- 671 Merz, D. M. U. E.: The biology of carbonate precipitation by cyanobacteria, *Facies*, 26(1), 81–101,  
672 doi:10.1007/BF02539795, 1992.
- 673 Meyers, P. A. and Ishiwatari, R.: Lacustrine organic geochemistry—an overview of indicators of  
674 organic matter sources and diagenesis in lake sediments, *Org. Geochem.*, 20(7), 867–900,  
675 doi:10.1016/0146-6380(93)90100-P, 1993.
- 676 Michelsen, A., Schmidt, I. K., Jonasson, S., Quarmby, C. and Sleep, D.: Leaf <sup>15</sup>N abundance of  
677 subarctic plants provides field evidence that ericoid, ectomycorrhizal and non- and arbuscular  
678 mycorrhizal species access different sources of soil nitrogen, *Oecologia*, 105(1), 53–63,  
679 doi:10.1007/BF00328791, 1996.
- 680 Michelsen, A., Quarmby, C., Sleep, D. and Jonasson, S.: Vascular plant <sup>15</sup>N natural abundance in  
681 heath and forest tundra ecosystems is closely correlated with presence and type of mycorrhizal fungi in  
682 roots, *Oecologia*, 115(3), 406–418, 1998.
- 683 Mutke, J. and Barthlott, W.: Patterns of vascular plant diversity at continental to global scales, *Biol.*  
684 *Skr.*, 55, 521–531, 2005.
- 685 [Nebel, M. & Philippi, G. Die Moose Baden-Württembergs. Ulmer, Stuttgart, DE, 2005.](#)
- 686 Nichols, J. E., Walcott, M., Bradley, R., Pilcher, J. and Huang, Y.: Quantitative assessment of  
687 precipitation seasonality and summer surface wetness using ombrotrophic sediments from an Arctic  
688 Norwegian peatland, *Quat. Res.*, 72(3), 443–451, 2009.
- 689 Nott, C. J., Xie, S., Avsejs, L. A., Maddy, D., Chambers, F. M. and Evershed, R. P.: *n*-Alkane  
690 distributions in ombrotrophic mires as indicators of vegetation change related to climatic variation,  
691 *Org. Geochem.*, 31(2–3), 231–235, doi:10.1016/S0146-6380(99)00153-9, 2000.
- 692 Oksanen, J., Blanchet, F. G., Kindt, R., Legendre, P., Minchin, P. R., O'Hara, R. B., Simpson, G. L.,  
693 Solymos, P., Stevens, M. H. H., Wagner, H. and others: Package “vegan”, *Community Ecol. Package*  
694 *Version, 2.0–10*, Available from: <http://www.R-project.org> (Accessed 22 October 2015), 2013.
- 695 O'Leary, M. H.: Carbon isotopes in photosynthesis, *Bioscience*, 328–336, 1988.



- 696 Poikolainen, J., Piispanen, J., Karhu, J. and Kubin, E.: Long-term changes in nitrogen deposition in  
697 Finland (1990–2006) monitored using the moss *Hylocomium splendens*, *Environ. Pollut.*, 157(11),  
698 3091–3097, doi:10.1016/j.envpol.2009.05.018, 2009.
- 699 Prahll, F. G., Bennett, J. T. and Carpenter, R.: The early diagenesis of aliphatic hydrocarbons and  
700 organic matter in sedimentary particulates from Dabob Bay, Washington, *Geochim. Cosmochim.*  
701 *Acta*, 44(12), 1967–1976, 1980.
- 702 Price, G. D., McKenzie, J. E., Pilcher, J. R. and Hoper, S. T.: Carbon-isotope variation in *Sphagnum*  
703 from hummock-hollow complexes: implications for Holocene climate reconstruction, *The Holocene*,  
704 7(2), 229–233, doi:10.1177/095968369700700211, 1997.
- 705 Proctor, M. C. F., Raven, J. A. and Rice, S. K.: Stable carbon isotope discrimination measurements in  
706 *Sphagnum* and other bryophytes: physiological and ecological implications, *J. Bryol.*, 17(2), 193–202,  
707 1992.
- 708 Radke, M., Willsch, H. and Welte, D. H.: Preparative hydrocarbon group type determination by  
709 automated medium pressure liquid chromatography, *Anal. Chem.*, 52(3), 406–411, 1980.
- 710 Raghoebarsing, A. A., Smolders, A. J. P., Schmid, M. C., Rijpstra, W. I. C., Wolters-Arts, M.,  
711 Derksen, J., Jetten, M. S. M., Schouten, S., Sinninghe Damsté, J. S., Lamers, L. P. M., Roelofs, J. G.  
712 M., Op den Camp, H. J. M. and Strous, M.: Methanotrophic symbionts provide carbon for  
713 photosynthesis in peat bogs, *Nature*, 436(7054), 1153–1156, doi:10.1038/nature03802, 2005.
- 714 R Core Team: R: A Language and Environment for Statistical Computing, R Foundation for Statistical  
715 Computing, Vienna, Austria. [online] Available from: <http://www.R-project.org>, 2014.
- 716 Rice, S. K. and Giles, L.: The influence of water content and leaf anatomy on carbon isotope  
717 discrimination and photosynthesis in *Sphagnum*, *Plant Cell Environ.*, 19(1), 118–124,  
718 doi:10.1111/j.1365-3040.1996.tb00233.x, 1996.
- 719 Rivas-Martinez, S. and Rivas-Saenz, S.: Worldwide Bioclimatic Classification System, 1996-2009,  
720 *Phytosociological Res. Cent. Spain* [online] Available from:  
721 <http://www.globalbioclimatics.org/default.htm> (Accessed 25 October 2012), 2007.
- 722 Rundel, P. W., Stichler, W., Zander, R. H. and Ziegler, H.: Carbon and hydrogen isotope ratios of  
723 bryophytes from arid and humid regions, *Oecologia*, 44(1), 91–94, doi:10.1007/BF00346404, 1979.
- 724 Ruttner, F.: Zur Frage der Karbonatassimilation der Wasserpflanzen, *Plant Syst. Evol.*, 94(1), 265–  
725 294, 1947.
- 726 Sachse, D., Radke, J. and Gleixner, G.:  $\delta D$  values of individual *n*-alkanes from terrestrial plants along  
727 a climatic gradient – Implications for the sedimentary biomarker record, *Org. Geochem.*, 37(4), 469–  
728 483, doi:10.1016/j.orggeochem.2005.12.003, 2006.
- 729 Salvucci, M. E. and Bowes, G.: Induction of reduced photorespiratory activity in submersed and  
730 amphibious aquatic macrophytes, *Plant Physiol.*, 67(2), 335–340, 1981.
- 731 Schellekens, J. and Buurman, P.: *n*-Alkane distributions as palaeoclimatic proxies in ombrotrophic  
732 peat: The role of decomposition and dominant vegetation, *Geoderma*, 164(3–4), 112–121,  
733 doi:10.1016/j.geoderma.2011.05.012, 2011.
- 734 Skrzypek, G., Kałużny, A., Wojtuń, B. and Jędrysek, M.-O.: The carbon stable isotopic composition  
735 of mosses: A record of temperature variation, *Org. Geochem.*, 38(10), 1770–1781,  
736 doi:10.1016/j.orggeochem.2007.05.002, 2007.

- 737 Smith, A. J. E.: The Moss Flora of Britain and Ireland, Cambridge University Press, Cambridge.,  
738 1978.
- 739 Smith, B. N. and Epstein, S.: Two categories of  $^{13}\text{C}/^{12}\text{C}$  ratios for higher plants, *Plant Physiol.*, 47(3),  
740 380–384, doi:10.1104/pp.47.3.380, 1971.
- 741 Sveinbjörnsson, B. and Oechel, W. C.: Controls on growth and productivity of bryophytes:  
742 environmental limitations under current and anticipated conditions, in *Bryophytes and lichens in a*  
743 *changing environment*/edited by Jeffrey W. Bates and Andrew M. Farmer, pp. 77–102, Oxford  
744 University Press, Oxford., 1992.
- 745 Tarnocai, C., Canadell, J. G., Schuur, E. A. G., Kuhry, P., Mazhitova, G. and Zimov, S.: Soil organic  
746 carbon pools in the northern circumpolar permafrost region, *Glob. Biogeochem. Cycles*, 23(2),  
747 GB2023, doi:10.1029/2008GB003327, 2009.
- 748 Turetsky, M. R.: The role of bryophytes in carbon and nitrogen cycling, *The Bryologist*, 106(3), 395–  
749 409, doi:10.1639/05, 2003.
- 750 Turetsky, M. R., Bond-Lamberty, B., Euskirchen, E., Talbot, J., Frohking, S., McGuire, A. D. and  
751 Tuittila, E.-S.: The resilience and functional role of moss in boreal and arctic ecosystems, *New*  
752 *Phytol.*, 196(1), 49–67, doi:10.1111/j.1469-8137.2012.04254.x, 2012.
- 753 Vile, M. A., Wieder, R. K., Živković, T., Scott, K. D., Vitt, D. H., Hartsock, J. A., Iosue, C. L., Quinn,  
754 J. C., Petix, M., Fillingim, H. M., Popma, J. M. A., Dynarski, K. A., Jackman, T. R., Albright, C. M.  
755 and Wyckoff, D. D.: N<sub>2</sub>-fixation by methanotrophs sustains carbon and nitrogen accumulation in  
756 pristine peatlands, *Biogeochemistry*, 1–12, doi:10.1007/s10533-014-0019-6, 2014.
- 757 Waite, M. and Sack, L.: Shifts in bryophyte carbon isotope ratio across an elevation x soil age matrix  
758 on Mauna Loa, Hawaii: do bryophytes behave like vascular plants? *Oecologia*, 166(1), 11–22,  
759 doi:10.1007/s00442-010-1903-y, 2011.
- 760 Wasley, J., Robinson, S. A., Lovelock, C. E. and Popp, M.: Some like it wet—biological  
761 characteristics underpinning tolerance of extreme water stress events in Antarctic bryophytes, *Funct.*  
762 *Plant Biol.*, 33(5), 443–455, 2006.
- 763 Wetterich, S., Schirrmeister, L., Meyer, H., Viehberg, F. A. and Mackensen, A.: Arctic freshwater  
764 ostracods from modern periglacial environments in the Lena River Delta (Siberian Arctic, Russia):  
765 geochemical applications for palaeoenvironmental reconstructions, *J. Paleolimnol.*, 39(4), 427–449,  
766 doi:10.1007/s10933-007-9122-1, 2008.
- 767 Zibulski, R., Herzschuh, U. and Pestryakova, L. A.: Vegetation patterns along micro-relief and  
768 vegetation type transects in polygonal landscapes of the Siberian Arctic, *J. Veg. Sci.*, 27(2), 377–386,  
769 doi:10.1111/jvs.12356, 2016.
- 770
- 771

772 **Figures**

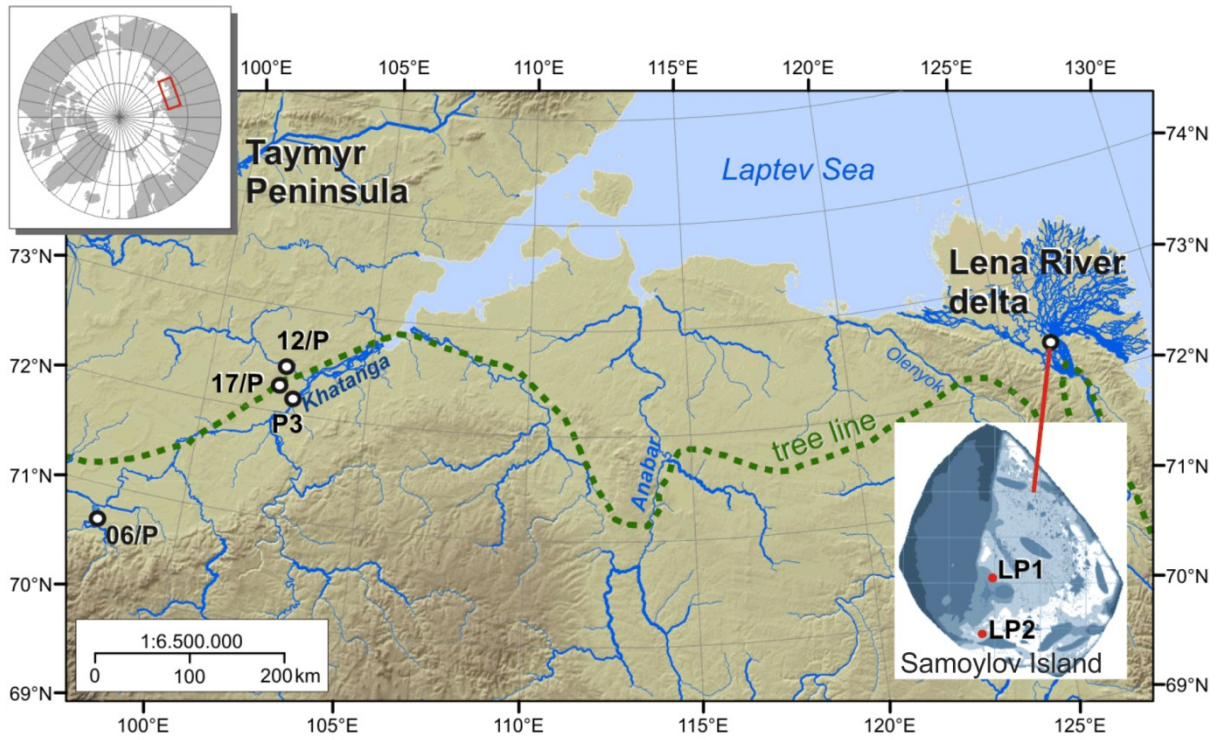

773

774 *Fig. 1: The Khatanga study sites are located in the south-east of the Taymyr Peninsula and both the sites on*  
775 *Samoylov Island are in the southern Lena River delta (Map by Th. Böhmer).*

776

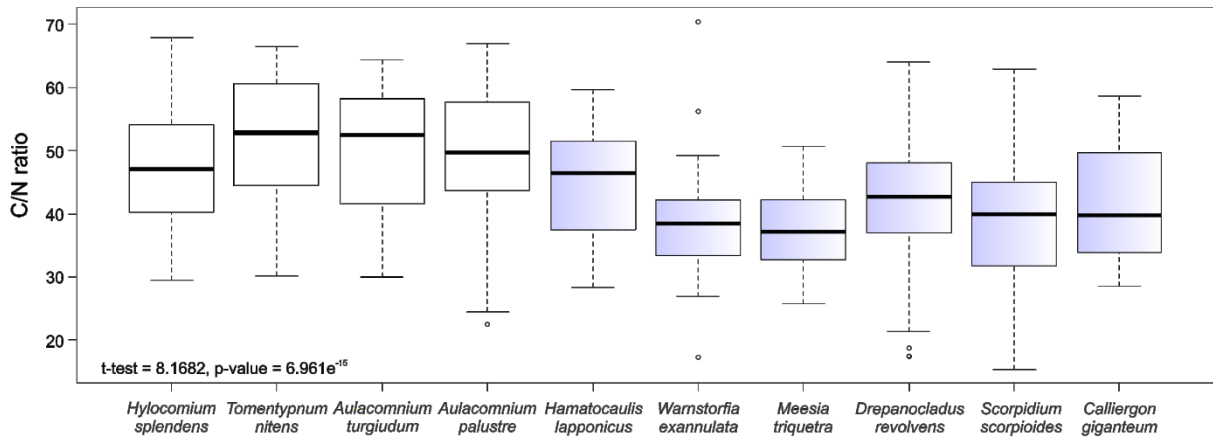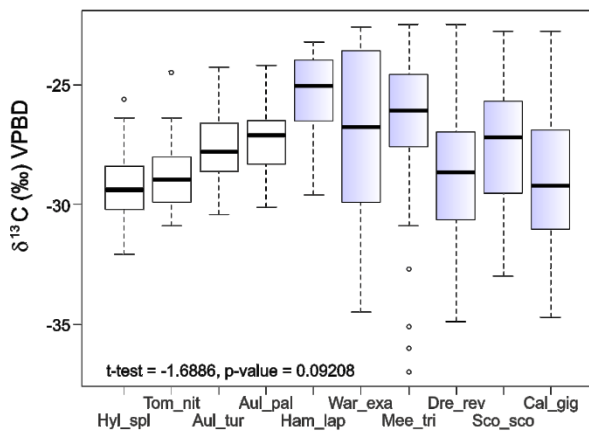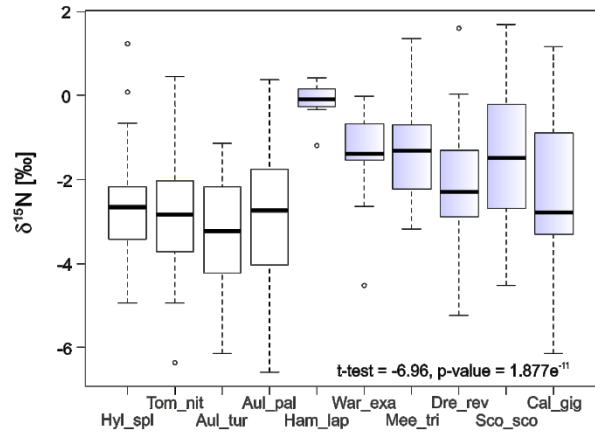

777

778 **Fig. 2:** *C/N ratios by weight,  $\delta^{13}\text{C}$  and  $\delta^{15}\text{N}$  values of the 10 moss taxa studied. White boxplots are the xero-*  
 779 *mesophilic group and boxplots shaded in blue are the meso-hygrophilic group ~~which prefers mesic to wet~~*  
 780 *moisture conditions. A t-test was done to distinguish the signals between both the two habitat groups.*

781

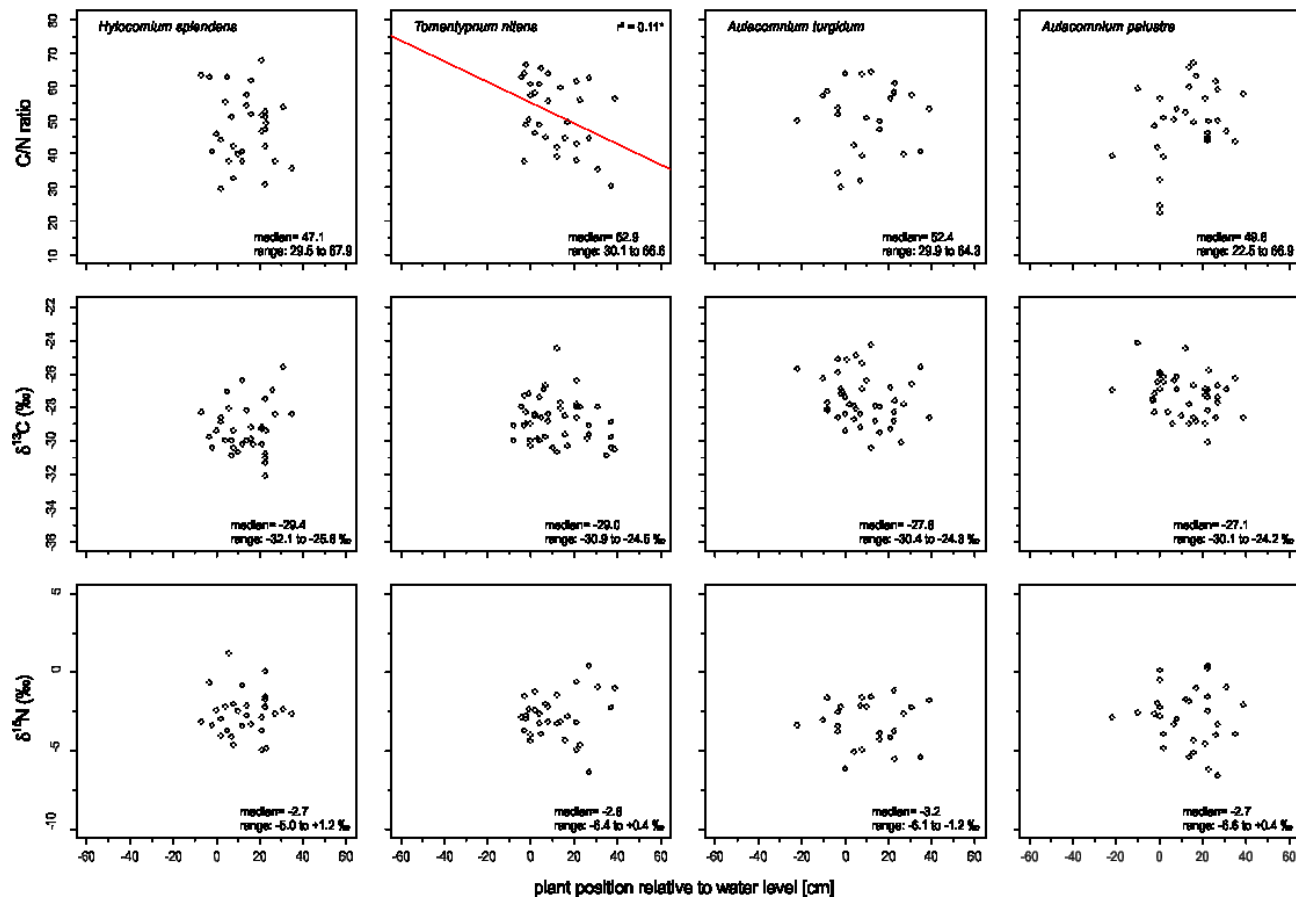

782

783 | **Fig. 3a:** Intraspecific relationships of the  $C/N_{(w)}$  ratio and the stable isotope values of carbon and nitrogen related to the water-level of the xero-mesophilic moss group.  
 784 Regression lines (red) are only plotted for significant data sets.

785

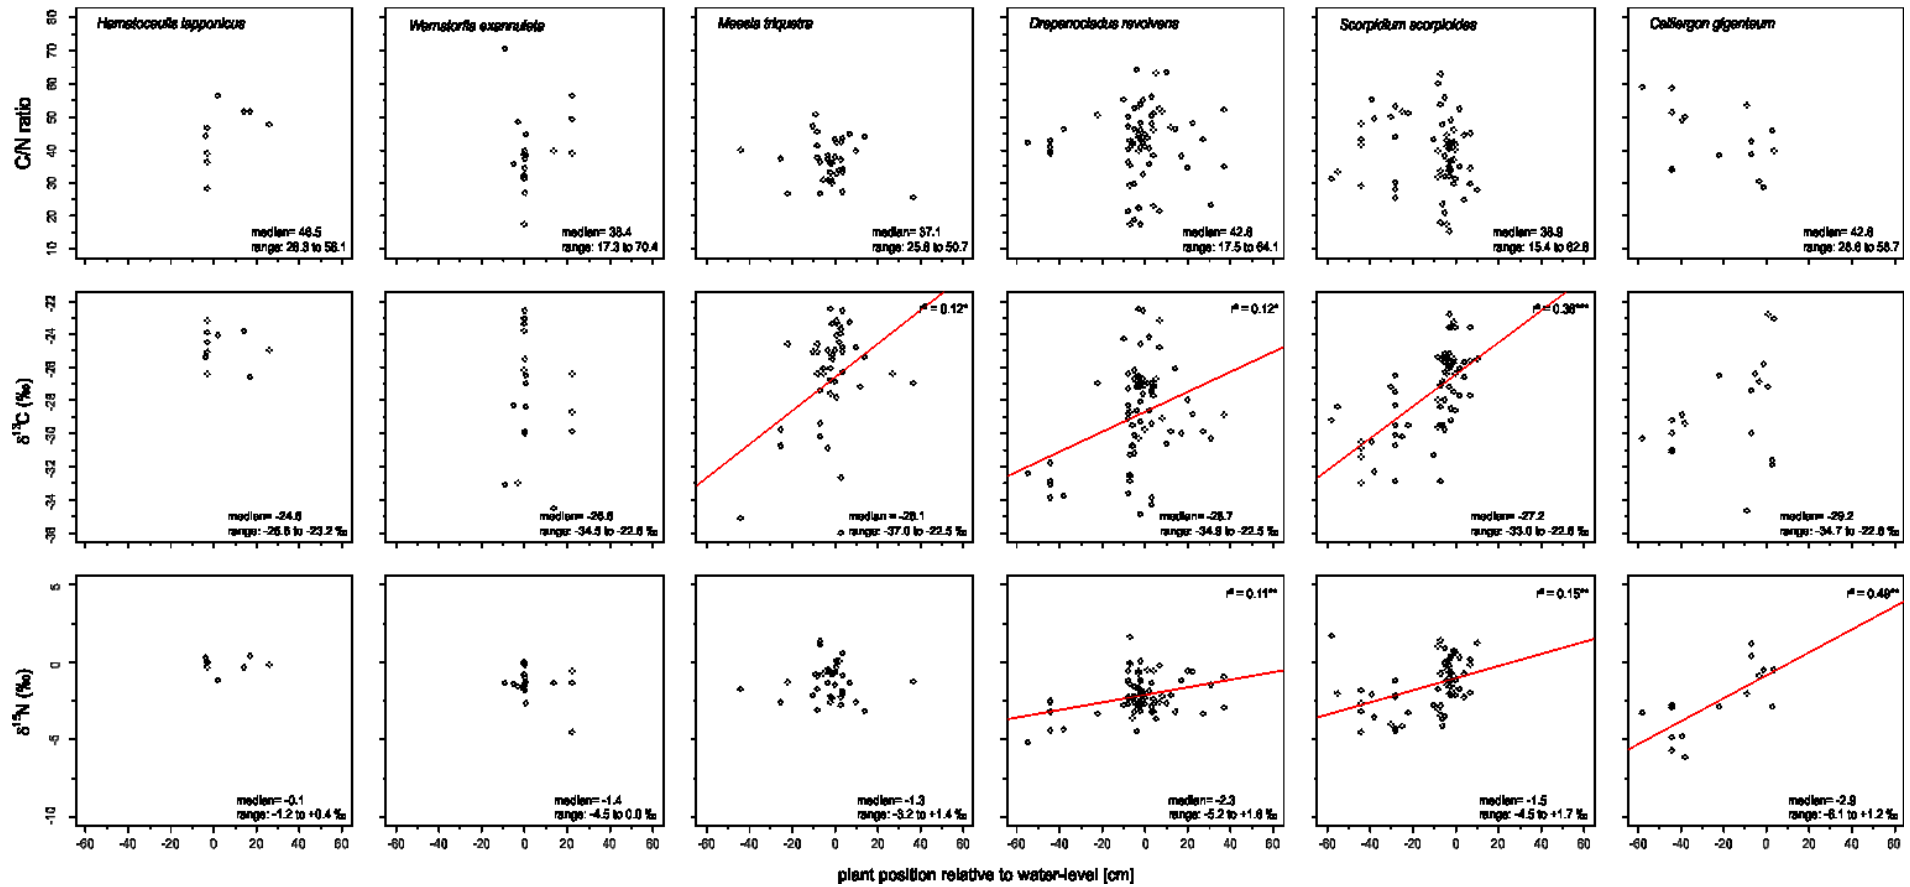

786

787 | **Fig 3b:** Intraspecific ~~relations~~relationships of the  $C/N_{(wt)}$ -ratio and the stable isotope values of carbon and nitrogen related to the water-level of the meso-hygrophilic moss  
 788 group. Regression lines (red) are only plotted for significant data sets.

789

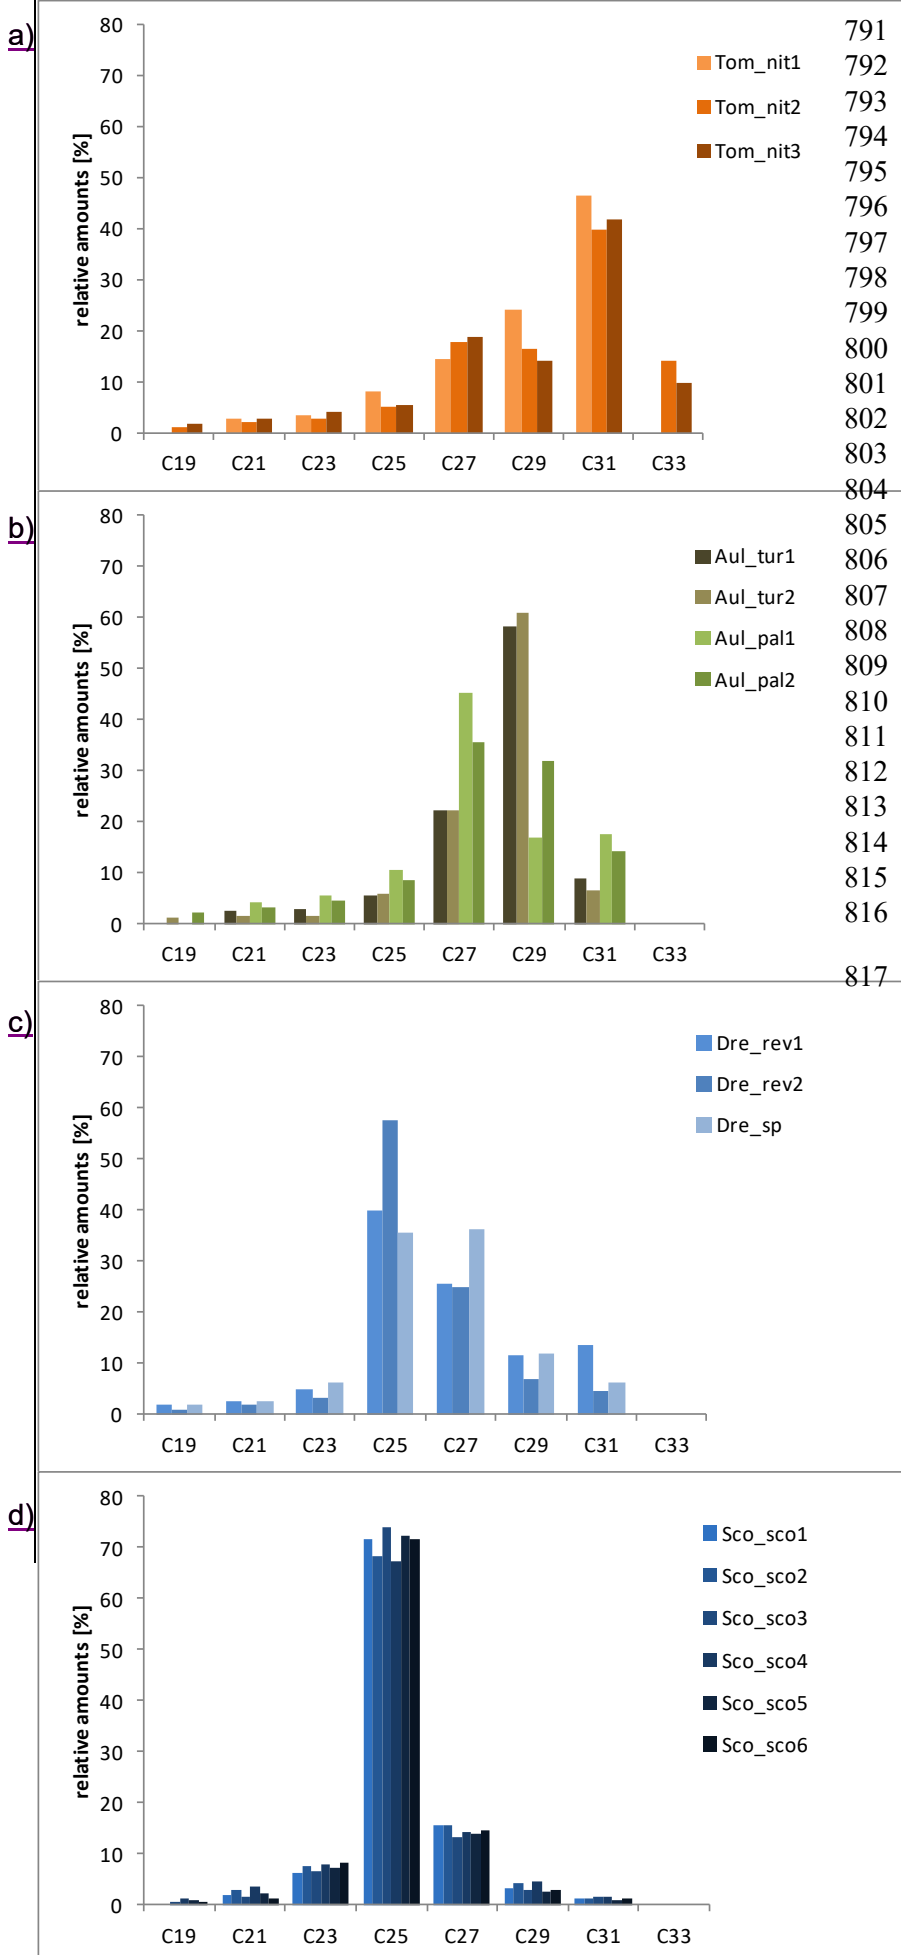

791 **Fig. 4:** The relative amounts  
 792 [%] of n-alkanes with an odd  
 793 number of carbon atoms in  
 794 selected moss species along  
 795 the P3 polygon complex  
 796 (species code plus position in  
 797 metres at P3) brown mosses  
 798 grouped by species and  
 799 ordered by their preferences  
 800 with respect to their mean  
 801 plant-position relative to  
 802 water-level from dry for xero-  
 803 mesophilic (a) to wet (, b) and  
 804 meso-hygrophilic (c, d)-  
 805 Additionally, the sample-  
 806 specific water level in cm is  
 807 given after the species code in  
 808 square brackets) mosses. Tom-  
 809 nit: Tomentypnum nitens;  
 810 Aul\_tur: Aulacomnium  
 811 turgidum; Aul\_pal:  
 812 Aulacomnium palustre;  
 813 Dre\_rev: Drepanocladus  
 814 revolvens; Dre\_sp:  
 815 Drepanocladus sp.; Sco\_sco:  
 816 Scorpidium scorpioides

817

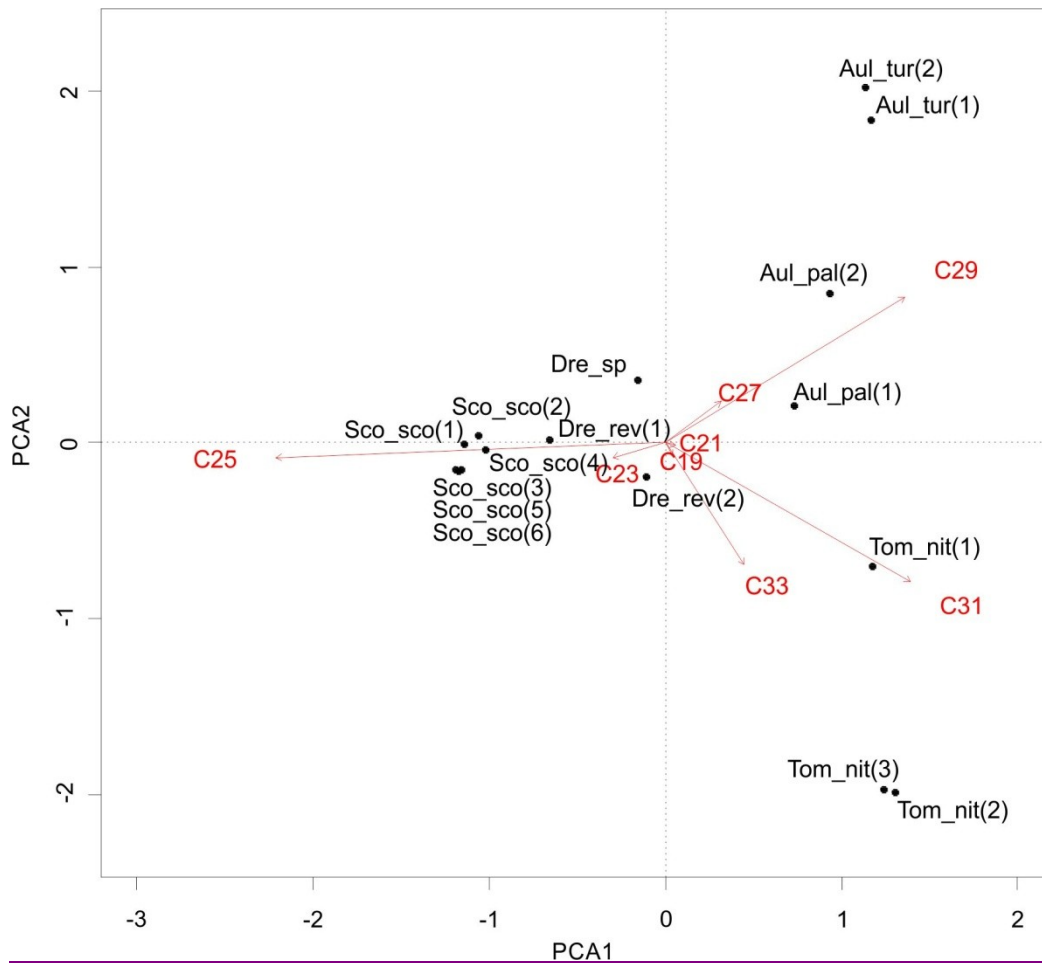

818

819 **Fig 5:** PCA of n-alkanes separates the meso-hygrophilic group on the left side of axis 1 from the xero-mesophilic  
 820 group on the right side. Along the second axis the Aulacomniaceae are distinguished from Tomentypnum nitens  
 821 according to the distribution of long-chain n-alkanes with more or less than 30 carbon atoms.

822



824 **Table A1:** Brief description of studied polygons. (For further information see Zibulski et al., 2016)

| polygon cross section,<br>(length of transect = polygon size)                       |  | coordinates              | short description<br>vegetation type; additional<br>information                 |
|-------------------------------------------------------------------------------------|-----------------------------------------------------------------------------------|--------------------------|---------------------------------------------------------------------------------|
|    |                                                                                   | 70.666° N,<br>97.708° E  | open forest; swinging bog<br>(mat of mosses)                                    |
|    |                                                                                   | 72.243° N,<br>102.233° E | forest-tundra intersection;<br>shallow and sparsely<br>vegetated                |
|    |                                                                                   | P3/I                     | forest-tundra intersection;<br>a complex of three<br>individual polygons:       |
|    |                                                                                   | 72.149° N,<br>102.693° E | P3/I - deep, open water<br>body                                                 |
|   |                                                                                   | P3/III                   | P3/II - shallow, open water<br>body<br>P3/III - shallow completely<br>vegetated |
|  |                                                                                   | 72.431° N,<br>102.373° E | tundra; shallow and<br>vegetated                                                |
|  |                                                                                   | 72.375° N,<br>126.483° E | tundra; deep polygon<br>without thaw depth below<br>the water body              |
|  |                                                                                   | 72.370° N,<br>126.481° E | tundra; shallow and<br>vegetated                                                |

826

**Table A2:** C/N ratio *by weight*,  $\delta^{13}\text{C}$  and  $\delta^{15}\text{N}$  data of individual mosses depending on their position relative to the water-level (cm).

| Species                            | C/N <sub>(wt)</sub> ratio |               | $\delta^{13}\text{C}$ [‰] |        |                   | $\delta^{15}\text{N}$ [‰] |        |                |
|------------------------------------|---------------------------|---------------|---------------------------|--------|-------------------|---------------------------|--------|----------------|
|                                    | median                    | range         | n                         | median | range             | n                         | median | range          |
| <i>H. splendens</i><br>(Hyl_spl)   | 47.1                      | 29.5 to 67.9  | 34                        | -29.4  | -32.1 to -25.6    | 31                        | -2.7   | -5.0 to +1.2   |
| <i>T. nitens</i><br>(Tom_nit)      | 52.9                      | 30.1 to 66.6* | 46                        | -29.0  | -30.9 to -24.5    | 30                        | -2.8   | -6.4 to +0.4   |
| <i>A. turgidum</i><br>(Aul_tur)    | 52.4                      | 29.9 to 64.3  | 41                        | -27.8  | -30.4 to 24.3     | 24                        | -3.2   | -6.1 to -1.2   |
| <i>A. palustre</i><br>(Aul_pal)    | 49.6                      | 22.5 to 66.9  | 40                        | -27.1  | -30.1 to -24.2    | 30                        | -2.7   | -6.6 to +0.4   |
| <i>H. lapponicus</i><br>(Ham_lap)  | 46.5                      | 28.3 to 56.1  | 10                        | -24.8  | -26.6 to -23.2    | 9                         | -0.1   | -1.2 to +0.4   |
| <i>W. exannulata</i><br>(War_exa)  | 38.4                      | 17.3 to 70.4  | 20                        | -26.8  | -34.5 to -22.6    | 19                        | -1.4   | -4.5 to 0.0    |
| <i>M. triquetra</i><br>(Mee_tri)   | 37.1                      | 25.8 to 50.7  | 45                        | -26.1  | -37.0 to -22.5*   | 34                        | -1.3   | -3.2 to +1.4   |
| <i>D. revolvens</i><br>(Dre_rev)   | 42.6                      | 17.5 to 64.1  | 72                        | -28.7  | -34.9 to -22.5*   | 67                        | -2.3   | -5.2 to +1.6** |
| <i>S. scorpioides</i><br>(Sco_sco) | 38.9                      | 15.4 to 62.8  | 69                        | -27.2  | -33.0 to -22.8*** | 65                        | -1.5   | -4.5 to +1.7** |
| <i>C. giganteum</i><br>(Cal_gig)   | 42.6                      | 28.6 to 58.7  | 21                        | -29.2  | -34.7 to -22.8    | 17                        | -2.9   | -6.1 to +1.2** |

Stars designate significant linear regressions between parameter and the plant position relative to water-level (\* p $\leq$ 0.01, \*\* p $\leq$ 0.05, \*\*\* p $\leq$ 0.001).

827  
828  
829  
830
